# Supplementary material for: Multiple hydrogen-bonding interactions between macrocyclic triurea and F−, Cl−, Br−, I− and NO3−: a theoretical investigation
Source: Royal Society of Chemistry journal article supplement (doi:10.1039/c0cp02749a), 2011-01-01
Supplement: c0cp02749a.pdf [file c0cp02749a.pdf]

## Supplementary Information

### 1 BSSE correction energies

**Table S1** BSSE correction energies (kcal mol<sup>-1</sup>) for 1-X<sup>-</sup> complexes

| X               | Binding mode | B3LYP/6-31(1)++G(d,p) | B3LYP/6-311++G(d,p) <sup>a</sup> |
|-----------------|--------------|-----------------------|----------------------------------|
| F               | I            | 3.69                  | 3.63                             |
| Cl              | I            | 1.64                  | 1.75                             |
| Br              | I            | 0.54                  | 0.53                             |
| I               | I            | 0.40                  | 0.41                             |
| NO <sub>3</sub> | I            | 2.70                  | 2.70                             |
| F               | II           | 3.48                  | 3.43                             |
| Cl              | II           | 1.51                  | 1.52                             |
| Br              | II           | 0.44                  | 0.42                             |
| I               | II           | 0.30                  | 0.29                             |
| NO <sub>3</sub> | II           | 2.42                  | 2.38                             |
| F               | III          | 3.61                  | 3.58                             |
| Cl              | III          | 1.61                  | 1.62                             |
| Br              | III          | 0.51                  | 0.50                             |
| I               | III          | 0.39                  | 0.36                             |
| NO <sub>3</sub> | III          | 2.72                  | 2.72                             |

<sup>a</sup> Correction energies were calculated based on the geometries optimized at the B3LYP/6-31(1)++G(d,p) level.

### 2 Gibbs free energy changes for 1-X<sup>-</sup> complexes with different alpha values

**Table S2** The calculated Gibbs free energy changes (kcal mol<sup>-1</sup>) for 1-X<sup>-</sup> complex with different alpha values in solution

| alpha           | experiment           | 1.20    | 1.25    | 1.30    | 1.35    | 1.40    |
|-----------------|----------------------|---------|---------|---------|---------|---------|
| Cl              | -4.52                | -1.31   | -3.84   | -4.41   | -6.93   | -8.42   |
|                 | (-1.38) <sup>a</sup> | (-1.56) | (-2.71) | (-1.89) | (-3.03) | (-3.17) |
| Br              | -3.14                | 0.25    | -1.13   | -2.52   | -3.90   | -5.25   |
|                 | (0.00)               | (0.00)  | (0.00)  | (0.00)  | (0.00)  | (0.00)  |
| NO <sub>3</sub> | -3.70                | -0.46   | -1.76   | -3.03   | -4.23   | -5.37   |
|                 | (-0.56)              | (-0.71) | (-0.63) | (-0.51) | (-0.33) | (-0.12) |
| I               | > 0                  | 4.02    | 2.45    | 1.66    | 0.44    | -0.76   |
|                 |                      | (3.77)  | (3.58)  | (4.18)  | (4.34)  | (4.49)  |

<sup>a</sup> The values in parentheses are the relative energies to Br<sup>-</sup> complex.

As shown in Table S2, although the calculated Gibbs free energy changes with different alpha values exhibit obvious differences, the relative values (in parentheses) of Gibbs free energy changes with different alpha are all consistent with the experiment.

### 3 Cartesian coordinates of the optimized geometries listed in Tables 4 and 6

C1 B3LYP/6-31++G(d,p)

|   |             |             |             |
|---|-------------|-------------|-------------|
| C | 3.94188000  | 1.48449900  | 0.57175700  |
| C | 4.36952500  | -3.40309300 | 0.79036200  |
| N | 3.58473900  | -2.17663100 | 0.92557900  |
| C | 4.17436600  | -0.97084300 | 0.58002300  |
| N | 3.45686200  | 0.15546400  | 0.92899100  |
| O | 5.26154100  | -0.91064700 | 0.00809600  |
| C | 3.70775300  | 1.84353000  | -0.90107900 |
| C | 4.35414200  | -4.00213000 | -0.61773000 |
| C | -5.25190700 | -2.72803700 | 0.17683000  |
| N | -3.90438300 | -3.06072000 | 0.62076100  |
| C | -2.90434200 | -3.29414500 | -0.30230900 |
| N | -1.65874400 | -3.56986100 | 0.24267100  |
| C | -0.59153200 | -4.08189600 | -0.62045700 |
| O | -3.10538600 | -3.27219900 | -1.51542100 |
| C | -5.46685500 | -1.26954200 | -0.24596600 |
| C | 0.39219000  | -2.98630300 | -1.04643100 |
| C | -3.21963600 | 2.76601100  | 1.13577900  |
| N | -1.82700800 | 3.07053600  | 0.82218900  |
| C | -1.50273000 | 4.18056300  | 0.06083100  |
| N | -0.16105400 | 4.26450000  | -0.26770000 |
| C | 0.35093800  | 5.44890700  | -0.94541500 |
| O | -2.33734800 | 5.00969900  | -0.29616000 |
| C | -4.02845600 | 2.28824500  | -0.07702200 |
| C | 1.68450300  | 5.15091000  | -1.62865700 |
| S | 2.82754400  | -4.92568000 | -1.10247400 |
| S | 1.67041800  | -3.59409100 | -2.22260300 |
| S | -5.39448200 | -0.14663500 | 1.22431200  |
| S | -5.72394500 | 1.72879300  | 0.37169900  |
| S | 2.99857500  | 4.80387700  | -0.35791700 |
| S | 4.32497900  | 3.52363200  | -1.33594900 |
| H | 3.44084700  | 2.20823000  | 1.22110700  |
| H | 5.01174800  | 1.52361300  | 0.78703400  |
| H | 5.41355500  | -3.18849500 | 1.04944300  |
| H | 3.98209900  | -4.12879700 | 1.51114900  |
| H | 2.90068900  | -2.15804100 | 1.66819700  |
| H | 2.47963800  | 0.05304900  | 1.16203700  |
| H | 2.65063400  | 1.76392200  | -1.17442500 |
| H | 4.28153700  | 1.16830500  | -1.54422500 |
| H | 5.14545800  | -4.75708700 | -0.68938800 |
| H | 4.55812300  | -3.23633100 | -1.36874200 |
| H | -5.47240100 | -3.35889700 | -0.68826700 |
| H | -5.94798700 | -3.00372600 | 0.97610700  |
| H | -3.64481200 | -2.81389100 | 1.56511100  |
| H | -1.64143600 | -3.86929700 | 1.20753000  |
| H | -0.05495900 | -4.86595800 | -0.07826800 |
| H | -1.04327600 | -4.52681200 | -1.51021700 |
| H | -6.45491500 | -1.16291800 | -0.70229800 |
| H | -4.70647100 | -0.97654100 | -0.97278800 |
| H | 0.88105700  | -2.52289300 | -0.18455700 |
| H | -0.13726500 | -2.20985200 | -1.61006400 |
| H | -3.21781200 | 1.99537200  | 1.91190000  |
| H | -3.68322900 | 3.66300700  | 1.55264000  |
| H | -1.19141800 | 2.28577700  | 0.78159200  |
| H | 0.49575400  | 3.81477400  | 0.35827600  |
| H | 0.45133800  | 6.29902000  | -0.25444200 |
| H | -0.38373000 | 5.74359700  | -1.69909700 |
| H | -3.51752200 | 1.47720100  | -0.60530400 |
| H | -4.17629300 | 3.11501500  | -0.77852100 |
| H | 2.00311800  | 6.01092400  | -2.22261600 |
| H | 1.59840400  | 4.27743600  | -2.27910000 |

C1a B3LYP/6-31++G(d,p)

|   |             |             |             |
|---|-------------|-------------|-------------|
| C | 0.00000000  | 4.25265800  | 0.16977200  |
| O | -0.38842600 | 5.20479000  | 0.84728300  |
| N | -0.64361000 | 3.86113800  | -0.99131700 |
| N | 1.10729600  | 3.50239200  | 0.50960500  |
| C | -1.86490200 | 4.53721200  | -1.40006700 |
| C | 1.97104100  | 3.99500500  | 1.58117700  |
| C | -3.12496400 | 4.14128700  | -0.61833200 |
| C | 3.28427100  | 3.22414000  | 1.65583500  |
| C | 3.68291000  | -2.12632900 | 0.16977200  |
| O | 4.70169300  | -2.26600800 | 0.84728300  |
| N | 3.66564900  | -1.37318600 | -0.99131700 |
| N | 2.47951300  | -2.71014200 | 0.50960500  |
| C | 4.86179200  | -0.65355400 | -1.40006700 |
| C | 2.47425500  | -3.70447400 | 1.58117700  |
| C | 5.14894200  | 0.63565500  | -0.61833200 |
| C | 1.15005200  | -4.45633200 | 1.65583500  |
| C | -3.68291000 | -2.12632900 | 0.16977200  |
| O | -4.31326700 | -2.93878200 | 0.84728300  |
| N | -3.02203900 | -2.48795200 | -0.99131700 |
| N | -3.58680900 | -0.79225000 | 0.50960500  |
| C | -2.99689000 | -3.88365900 | -1.40006700 |
| C | -4.44529600 | -0.29053100 | 1.58117700  |
| C | -2.02397800 | -4.77694200 | -0.61833200 |
| C | -4.43432300 | 1.23219200  | 1.65583500  |
| S | -0.27459900 | -4.43832300 | -1.12180600 |
| S | 0.82591700  | -5.59031400 | 0.22543800  |
| S | 3.98100000  | 1.98135200  | -1.12180600 |
| S | 4.42839500  | 3.51042200  | 0.22543800  |
| S | -3.70640100 | 2.45697100  | -1.12180600 |
| S | -5.25431200 | 2.07989200  | 0.22543800  |
| H | -0.47520200 | 2.92973700  | -1.34355600 |
| H | 1.56618400  | 2.98838600  | -0.23223400 |
| H | -2.00338700 | 4.37388800  | -2.47421400 |
| H | -1.71049800 | 5.60861600  | -1.24698600 |
| H | 1.44645700  | 3.88730300  | 2.53820900  |
| H | 2.16961100  | 5.06531400  | 1.44801000  |
| H | -3.93320800 | 4.84625500  | -0.83145700 |
| H | -2.91618100 | 4.15139000  | 0.45277600  |
| H | 3.84694600  | 3.56814100  | 2.52973300  |
| H | 3.12569200  | 2.14721900  | 1.76501300  |
| H | 2.77482800  | -1.05333200 | -1.34355600 |
| H | 1.80492600  | -2.85054800 | -0.23223400 |
| H | 4.78959200  | -0.45196000 | -2.47421400 |
| H | 5.71245300  | -1.32297300 | -1.24698600 |
| H | 2.64327500  | -3.19632000 | 2.53820900  |
| H | 3.30188500  | -4.41159500 | 1.44801000  |
| H | 6.16358400  | 0.98313100  | -0.83145700 |
| H | 5.05330000  | 0.44979200  | 0.45277600  |
| H | 1.16662800  | -5.11562400 | 2.52973300  |
| H | 0.29670000  | -3.78053800 | 1.76501300  |
| H | -2.29962600 | -1.87640600 | -1.34355600 |
| H | -3.37111000 | -0.13783800 | -0.23223400 |
| H | -2.78620500 | -3.92192800 | -2.47421400 |
| H | -4.00195500 | -4.28564300 | -1.24698600 |
| H | -4.08973200 | -0.69098300 | 2.53820900  |
| H | -5.47149600 | -0.65371900 | 1.44801000  |
| H | -2.23037600 | -5.82938600 | -0.83145700 |
| H | -2.13711900 | -4.60118200 | 0.45277600  |
| H | -5.01357400 | 1.54748200  | 2.52973300  |
| H | -3.42239200 | 1.63331900  | 1.76501300  |

C2 B3LYP/6-31++G(d,p)

|   |             |             |             |
|---|-------------|-------------|-------------|
| C | -1.82716605 | -2.56561112 | -1.83926787 |
| C | -3.70357440 | 1.10105217  | 0.71858613  |
| N | -2.53534697 | 0.27069087  | 0.40607013  |
| C | -2.64464903 | -0.51775077 | -0.76322187 |
| N | -1.67779075 | -1.46782178 | -0.89569887 |
| O | -3.52694063 | -0.31851843 | -1.59833588 |
| C | -2.84146690 | -3.62014735 | -1.37964188 |
| C | -3.47634064 | 2.06458942  | 1.87508513  |
| C | 2.80532635  | 2.65686343  | 0.71858613  |
| N | 1.50209865  | 2.06032945  | 0.40607013  |
| C | 0.87393920  | 2.54920863  | -0.76322187 |
| N | -0.43227557 | 2.18692030  | -0.89569887 |
| C | -1.30830138 | 2.86517777  | -1.83926787 |
| O | 1.48762526  | 3.21367940  | -1.59833588 |
| C | 3.52615720  | 1.97830460  | 1.87508513  |
| C | -1.71440612 | 4.27085619  | -1.37964188 |
| C | 3.13546743  | -0.29956666 | -1.83926787 |
| N | 2.11006632  | -0.71909852 | -0.89569887 |
| C | 1.77070983  | -2.03145786 | -0.76322187 |
| N | 1.03324832  | -2.33102032 | 0.40607013  |
| C | 0.89824805  | -3.75791560 | 0.71858613  |
| O | 2.03931537  | -2.89516097 | -1.59833588 |
| C | 4.55587302  | -0.65070884 | -1.37964188 |
| C | -0.04981656 | -4.04289402 | 1.87508513  |
| S | -2.25519070 | 3.44167733  | 1.65670314  |
| S | -2.97357027 | 4.46176032  | -0.03592686 |
| S | 4.10817534  | 0.23221377  | 1.65670314  |
| S | 5.35078292  | 0.34430723  | -0.03592686 |
| S | -1.85298465 | -3.67389110 | 1.65670314  |
| S | -2.37721265 | -4.80606755 | -0.03592686 |
| H | -2.18155133 | -2.15408299 | -2.78959687 |
| H | -0.84171927 | -3.00668554 | -2.00809987 |
| H | -4.57384390 | 0.47660427  | 0.97083712  |
| H | -3.97372783 | 1.65046514  | -0.18447387 |
| H | -2.20020226 | -0.26653674 | 1.20140513  |
| H | -0.97539621 | -1.58894282 | -0.17394186 |
| H | -3.04830673 | -4.31589494 | -2.20281389 |
| H | -3.78542099 | -3.13902877 | -1.11328289 |
| H | -4.43592731 | 2.51509803  | 2.14237912  |
| H | -3.10438074 | 1.54850385  | 2.77001613  |
| H | 2.69967335  | 3.72276287  | 0.97083712  |
| H | 3.41620865  | 2.61611668  | -0.18447387 |
| H | 0.86927354  | 2.03869942  | 1.20140513  |
| H | -0.88836674 | 1.63918930  | -0.17394186 |
| H | -2.18300643 | 2.23229305  | -2.00809987 |
| H | -0.77471493 | 2.96632037  | -2.78959687 |
| H | 4.39610245  | 2.58407673  | 2.14237912  |
| H | 2.89323404  | 1.91422066  | 2.77001613  |
| H | -0.82576816 | 4.84778513  | -1.11328289 |
| H | -2.21352130 | 4.79785854  | -2.20281389 |
| H | 3.02472570  | 0.77439250  | -2.00809987 |
| H | 2.95626626  | -0.81223738 | -2.78959687 |
| H | 1.86376295  | -0.05024648 | -0.17394186 |
| H | 1.33092872  | -1.77216268 | 1.20140513  |
| H | 0.55751918  | -4.26658182 | -0.18447387 |
| H | 1.87417054  | -4.19936714 | 0.97083712  |
| H | 5.26182802  | -0.48196359 | -2.20281389 |
| H | 4.61118915  | -1.70875636 | -1.11328289 |
| H | 0.03982487  | -5.09917476 | 2.14237912  |
| H | 0.21114670  | -3.46272451 | 2.77001613  |

C3 B3LYP/6-31++G(d,p)

|   |             |             |             |
|---|-------------|-------------|-------------|
| C | 1.54465861  | 4.64290701  | 0.36253897  |
| O | 1.28404787  | 5.17591726  | 1.44187597  |
| N | 0.91903462  | 5.00975661  | -0.81698503 |
| N | 2.47410179  | 3.63371632  | 0.22394598  |
| C | -0.20129136 | 5.94172114  | -0.78896103 |
| C | 3.31316265  | 3.24265589  | 1.34657898  |
| C | -1.49763978 | 5.39608830  | -0.17298203 |
| C | 3.80170674  | 1.80314769  | 1.19556799  |
| C | 3.24854611  | -3.65916710 | 0.36253897  |
| O | 3.84045189  | -3.69997671 | 1.44187597  |
| N | 3.87905918  | -3.30078563 | -0.81698503 |
| N | 1.90983975  | -3.95949316 | 0.22394598  |
| C | 5.24632713  | -2.79653714 | -0.78896103 |
| C | 1.15164105  | -4.49061097 | 1.34657898  |
| C | 5.42196944  | -1.40105005 | -0.17298203 |
| C | -0.33928167 | -4.19394846 | 1.19556799  |
| C | -4.79320473 | -0.98373991 | 0.36253897  |
| O | -5.12449977 | -1.47594055 | 1.44187597  |
| N | -4.79809380 | -1.70897097 | -0.81698503 |
| N | -4.38394153 | 0.32577684  | 0.22394598  |
| C | -5.04503577 | -3.14518401 | -0.78896103 |
| C | -4.46480370 | 1.24795508  | 1.34657898  |
| C | -3.92432966 | -3.99503825 | -0.17298203 |
| C | -3.46242508 | 2.39080077  | 1.19556799  |
| S | -2.36446214 | -3.80159387 | -1.15041800 |
| S | -1.05607291 | -5.13707045 | -0.24066699 |
| S | 4.47450794  | -0.14688734 | -1.15041800 |
| S | 4.97686996  | 1.65394925  | -0.24066699 |
| S | -2.11004580 | 3.94848122  | -1.15041800 |
| S | -3.92079705 | 3.48312119  | -0.24066699 |
| H | 0.93678297  | 4.34220972  | -1.57576602 |
| H | 2.86356690  | 3.46430758  | -0.69509402 |
| H | -0.37581623 | 6.27725996  | -1.81617903 |
| H | 0.10050749  | 6.81259322  | -0.19994503 |
| H | 2.70934300  | 3.32749384  | 2.25379398  |
| H | 4.16564328  | 3.92741751  | 1.47075298  |
| H | -2.26792437 | 6.17241863  | -0.18946003 |
| H | -1.31497349 | 5.08652280  | 0.85735597  |
| H | 4.32473610  | 1.48985465  | 2.10288299  |
| H | 2.96421578  | 1.12646402  | 1.00882599  |
| H | 3.29207244  | -2.98238271 | -1.57576602 |
| H | 1.56839492  | -4.21207547 | -0.69509402 |
| H | 5.62417471  | -2.81316358 | -1.81617903 |
| H | 5.84962505  | -3.49333865 | -0.19994503 |
| H | 1.52702270  | -4.01010679 | 2.25379398  |
| H | 1.31842170  | -5.57126166 | 1.47075298  |
| H | 6.47943352  | -1.12212920 | -0.18946003 |
| H | 5.06254471  | -1.40446095 | 0.85735597  |
| H | -0.87211608 | -4.49025865 | 2.10288299  |
| H | -0.50656143 | -3.13031818 | 1.00882599  |
| H | -4.22885541 | -1.35982701 | -1.57576602 |
| H | -4.43196182 | 0.74776789  | -0.69509402 |
| H | -5.24835848 | -3.46409638 | -1.81617903 |
| H | -5.95013254 | -3.31925457 | -0.19994503 |
| H | -4.23636570 | 0.68261295  | 2.25379398  |
| H | -5.48406498 | 1.64384415  | 1.47075298  |
| H | -4.21150915 | -5.05028943 | -0.18946003 |
| H | -3.74757121 | -3.68206185 | 0.85735597  |
| H | -3.45262002 | 3.00040401  | 2.10288299  |
| H | -2.45765435 | 2.00385416  | 1.00882599  |

C4 B3LYP/6-31++G(d,p)

|   |             |             |             |
|---|-------------|-------------|-------------|
| C | -4.60805824 | -1.02829612 | -0.50281608 |
| O | -3.63611832 | -0.57390637 | -1.10073008 |
| N | -5.62533495 | -0.22800961 | -0.01380909 |
| N | -4.78109588 | -2.38121402 | -0.27570307 |
| C | -5.52900150 | 1.22570652  | -0.07140310 |
| C | -3.86644761 | -3.36794189 | -0.83647506 |
| C | -4.71120130 | 1.81956115  | 1.08304990  |
| C | -2.85890332 | -3.86389187 | 0.21149595  |
| C | 3.19455968  | -3.47654743 | -0.50281608 |
| O | 2.31507666  | -2.86201765 | -1.10073008 |
| N | 3.01012959  | -4.75767817 | -0.01380909 |
| N | 4.45273977  | -2.94994348 | -0.27570307 |
| C | 1.70300777  | -5.40110902 | -0.07140310 |
| C | 4.84994704  | -1.66447091 | -0.83647506 |
| C | 0.77981447  | -4.98980058 | 1.08304990  |
| C | 4.77568018  | -0.54393697 | 0.21149595  |
| C | 1.41349855  | 4.50484356  | -0.50281608 |
| O | 1.32104166  | 3.43592402  | -1.10073008 |
| N | 2.61520537  | 4.98568777  | -0.01380909 |
| N | 0.32835611  | 5.33115750  | -0.27570307 |
| C | 3.82599374  | 4.17540250  | -0.07140310 |
| C | -0.98349943 | 5.03241280  | -0.83647506 |
| C | 3.93138682  | 3.17023943  | 1.08304990  |
| C | -1.91677685 | 4.40782884  | 0.21149595  |
| S | -4.75224485 | 3.66245088  | 1.13704589  |
| S | -1.87867732 | -5.25995772 | -0.50547103 |
| S | -0.79565308 | -5.94679020 | 1.13704589  |
| S | 5.49459567  | 1.00299657  | -0.50547103 |
| S | 5.54789793  | 2.28433932  | 1.13704589  |
| S | -3.61591835 | 4.25696114  | -0.50547103 |
| H | -6.26005439 | -0.62155422 | 0.66682391  |
| H | -5.68072408 | -2.70771026 | 0.04509893  |
| H | -6.54319939 | 1.63672036  | -0.06138811 |
| H | -5.06363095 | 1.49021074  | -1.02275210 |
| H | -3.34139146 | -2.90214129 | -1.67390806 |
| H | -4.45345040 | -4.20854280 | -1.22272205 |
| H | -5.13618722 | 1.52798227  | 2.05196890  |
| H | -3.67646441 | 1.47044591  | 1.04367291  |
| H | -2.18792541 | -3.05048233 | 0.49787095  |
| H | -3.37764524 | -4.23537136 | 1.09945296  |
| H | 3.66830894  | -5.11058902 | 0.66682391  |
| H | 5.18530791  | -3.56579623 | 0.04509893  |
| H | 1.85415829  | -6.48493707 | -0.06138811 |
| H | 1.24125512  | -5.13033841 | -1.02275210 |
| H | 4.18402382  | -1.44265924 | -1.67390806 |
| H | 5.87143017  | -1.75252978 | -1.22272205 |
| H | 1.24482215  | -5.21205974 | 2.05196890  |
| H | 0.56478869  | -3.91913453 | 1.04367291  |
| H | 5.35676181  | -0.80744090 | 1.09945296  |
| H | 3.73575790  | -0.36955782 | 0.49787095  |
| H | 2.59174545  | 5.73214324  | 0.66682391  |
| H | 0.49541616  | 6.27350650  | 0.04509893  |
| H | 4.68904110  | 4.84821672  | -0.06138811 |
| H | 3.82237583  | 3.64012767  | -1.02275210 |
| H | -0.84263235 | 4.34480054  | -1.67390806 |
| H | -1.41797978 | 5.96107258  | -1.22272205 |
| H | 3.89136507  | 3.68407747  | 2.05196890  |
| H | 3.11167572  | 2.44868862  | 1.04367291  |
| H | -1.54783249 | 3.42004015  | 0.49787095  |
| H | -1.97911657 | 5.04281226  | 1.09945296  |

C5 B3LYP/6-31++G(d,p)

|   |             |             |             |
|---|-------------|-------------|-------------|
| C | 0.42215300  | -1.48533000 | 3.42175400  |
| C | -0.24963500 | -2.68756400 | 2.74385100  |
| S | -1.42333800 | -2.21827500 | 1.39529100  |
| S | -0.28711700 | -2.28495100 | -0.36140800 |
| C | -0.77738400 | -3.88285800 | -1.14836500 |
| C | -2.00134500 | -3.80001200 | -2.07255900 |
| N | -3.20395100 | -3.32561600 | -1.41139500 |
| C | -3.69200200 | -2.05495200 | -1.65452300 |
| N | -4.63080000 | -1.60894300 | -0.73664100 |
| C | -4.99506500 | -0.19449500 | -0.72663300 |
| C | -3.83995000 | 0.67800900  | -0.20897700 |
| S | -4.35914500 | 2.44623900  | -0.05154700 |
| S | -2.63398200 | 3.52067400  | -0.52535400 |
| C | -1.78249800 | 3.77906900  | 1.08820700  |
| C | -1.03297100 | 2.56825000  | 1.65894700  |
| N | -0.00904300 | 1.99358000  | 0.78145500  |
| C | 1.10654900  | 2.77514000  | 0.47519600  |
| N | 1.90807000  | 2.25979100  | -0.52319800 |
| C | 2.95748900  | 3.06969400  | -1.13563100 |
| C | 4.35304300  | 2.44671700  | -1.05496700 |
| S | 4.75905300  | 1.10944400  | -2.26691600 |
| S | 3.43706800  | -0.47000200 | -1.90205700 |
| C | 4.27903300  | -1.50081900 | -0.62265800 |
| C | 4.47605400  | -0.83438200 | 0.74356400  |
| N | 3.25307900  | -0.36304000 | 1.36460400  |
| C | 2.52078800  | -1.18535500 | 2.19363200  |
| N | 1.28390100  | -0.70176400 | 2.55697300  |
| O | -3.35640600 | -1.38340500 | -2.62774900 |
| O | 1.38419000  | 3.79659600  | 1.09990800  |
| O | 2.95091600  | -2.26455700 | 2.61265600  |
| H | 1.02159700  | -1.86681100 | 4.25553800  |
| H | -0.33762800 | -0.81381300 | 3.83286700  |
| H | -0.85599700 | -3.23438900 | 3.47573000  |
| H | 0.50018000  | -3.36902600 | 2.33723800  |
| H | -0.91813500 | -4.61743000 | -0.34945300 |
| H | 0.09702300  | -4.19517800 | -1.73143200 |
| H | -2.17559200 | -4.79832000 | -2.49735400 |
| H | -1.81404700 | -3.11487800 | -2.90186900 |
| H | -3.45719300 | -3.77231200 | -0.54094300 |
| H | -4.65343000 | -2.07477700 | 0.16108900  |
| H | -5.25593000 | 0.10212400  | -1.74411000 |
| H | -5.88698800 | -0.08667300 | -0.10155200 |
| H | -3.01580500 | 0.63252000  | -0.92299900 |
| H | -3.49691100 | 0.31233200  | 0.76350000  |
| H | -1.07412100 | 4.58934800  | 0.88820100  |
| H | -2.51664500 | 4.14019800  | 1.81439800  |
| H | -1.73350000 | 1.76596300  | 1.90744900  |
| H | -0.54150600 | 2.88201600  | 2.58474900  |
| H | -0.38510400 | 1.45427500  | 0.00899000  |
| H | 1.58624200  | 1.45286400  | -1.04230100 |
| H | 2.96822900  | 4.01548600  | -0.58690900 |
| H | 2.70460400  | 3.28264100  | -2.18134100 |
| H | 4.56906600  | 2.11536700  | -0.03650500 |
| H | 5.09705300  | 3.20891200  | -1.31866800 |
| H | 5.23982900  | -1.83316800 | -1.02725000 |
| H | 3.62190000  | -2.37243000 | -0.52689100 |
| H | 4.92347600  | -1.56621300 | 1.42157600  |
| H | 5.17655900  | 0.00153400  | 0.65110300  |
| H | 2.80584500  | 0.44875000  | 0.95741400  |
| H | 0.89603500  | 0.10874600  | 2.08785800  |

C6 B3LYP/6-31++G(d,p)

|   |             |             |             |
|---|-------------|-------------|-------------|
| C | -0.65237500 | -1.68697800 | -1.18306000 |
| C | 3.59355300  | -2.56316800 | 1.14148400  |
| N | 2.55132200  | -1.70645400 | 0.61709800  |
| C | 1.45730300  | -2.23011100 | -0.02406200 |
| N | 0.55617600  | -1.29352700 | -0.48333800 |
| O | 1.28954800  | -3.44501700 | -0.18138600 |
| C | -1.77249400 | -2.12312800 | -0.22103200 |
| C | 4.49173400  | -3.23378000 | 0.09645100  |
| C | 1.08200500  | 3.72391800  | 0.45389700  |
| N | 2.48029300  | 3.56348900  | 0.84067400  |
| C | 3.06250400  | 2.32481600  | 0.94600500  |
| N | 4.36664100  | 2.30846900  | 1.37989100  |
| C | 5.14636300  | 1.07264500  | 1.40002100  |
| O | 2.43728100  | 1.28754400  | 0.68296300  |
| C | 0.89661600  | 3.75504600  | -1.06678000 |
| C | 5.71653200  | 0.71326800  | 0.02137900  |
| C | -4.08571700 | 2.88036000  | 0.33944500  |
| N | -4.85807200 | 1.77305500  | -0.19642300 |
| C | -5.41315500 | 0.83128400  | 0.64868600  |
| N | -5.95276800 | -0.27253600 | 0.01922000  |
| C | -6.40990000 | -1.40203500 | 0.81827100  |
| O | -5.46351200 | 0.99438700  | 1.87036800  |
| C | -2.60624000 | 2.54277900  | 0.55648100  |
| C | -5.29808400 | -2.33538100 | 1.31475500  |
| S | -3.35040800 | -2.30437600 | -1.17069700 |
| S | -4.55535200 | -3.47781700 | 0.06776000  |
| S | -1.71783200 | 2.12643400  | -1.01676400 |
| S | -0.85353900 | 3.93529500  | -1.61452900 |
| S | 5.35457800  | -2.15190000 | -1.11860300 |
| S | 6.61919400  | -0.90350300 | -0.01405800 |
| H | -0.41665200 | -2.51275600 | -1.85917900 |
| H | -0.97658800 | -0.83286700 | -1.78565500 |
| H | 3.13827000  | -3.36902600 | 1.73030100  |
| H | 4.20528400  | -1.96673000 | 1.82497200  |
| H | 2.66820000  | -0.69909800 | 0.64845400  |
| H | 0.70119200  | -0.31666600 | -0.26424400 |
| H | -1.91050100 | -1.37590000 | 0.56586400  |
| H | -1.52749400 | -3.08610400 | 0.23112400  |
| H | 5.23291800  | -3.86449400 | 0.59694100  |
| H | 3.88158800  | -3.87105000 | -0.55323100 |
| H | 0.70774100  | 4.64859000  | 0.90301900  |
| H | 0.51817100  | 2.88671400  | 0.87193600  |
| H | 3.00683000  | 4.38610200  | 1.09349200  |
| H | 4.86972900  | 3.18179300  | 1.44369400  |
| H | 4.49939000  | 0.27554800  | 1.76731500  |
| H | 5.95175700  | 1.19724200  | 2.12962200  |
| H | 1.31796300  | 2.85383800  | -1.51849800 |
| H | 1.39792100  | 4.62526100  | -1.50706100 |
| H | 6.43582700  | 1.47334300  | -0.30275600 |
| H | 4.91849300  | 0.65673200  | -0.72197600 |
| H | -4.18411800 | 3.73847400  | -0.33303300 |
| H | -4.52940200 | 3.14691100  | 1.30260000  |
| H | -4.72918900 | 1.54339200  | -1.17203400 |
| H | -5.60130800 | -0.49577200 | -0.90238000 |
| H | -6.92504700 | -0.98890400 | 1.68986000  |
| H | -7.13737500 | -1.96569900 | 0.22613800  |
| H | -2.07973100 | 3.37129600  | 1.03728300  |
| H | -2.51627600 | 1.65810000  | 1.19517600  |
| H | -5.71662800 | -3.03617500 | 2.04832900  |
| H | -4.51077300 | -1.76822200 | 1.81712300  |



C6 B3LYP/6-31(1)++G(d,p)

|   |             |             |             |
|---|-------------|-------------|-------------|
| C | -0.65051275 | -1.67535479 | -1.16640847 |
| C | 3.60003350  | -2.56461827 | 1.14389661  |
| N | 2.55823213  | -1.70855024 | 0.61997639  |
| C | 1.45798811  | -2.22880454 | -0.01041608 |
| N | 0.55557302  | -1.29054908 | -0.45907985 |
| O | 1.28541704  | -3.44378000 | -0.16663050 |
| C | -1.77331929 | -2.12199794 | -0.21158620 |
| C | 4.49438347  | -3.23938796 | 0.09744237  |
| C | 1.08325215  | 3.72599060  | 0.45601077  |
| N | 2.48029466  | 3.55932229  | 0.84167237  |
| C | 3.06160060  | 2.32118004  | 0.94100348  |
| N | 4.36585027  | 2.30328661  | 1.36936199  |
| C | 5.14672589  | 1.06920562  | 1.39068327  |
| O | 2.43564058  | 1.28430658  | 0.67525928  |
| C | 0.89738019  | 3.76511609  | -1.06504684 |
| C | 5.71462697  | 0.70688521  | 0.01111897  |
| C | -4.09143929 | 2.87938248  | 0.33848146  |
| N | -4.85582688 | 1.76632387  | -0.19437886 |
| C | -5.41372006 | 0.82607880  | 0.64805058  |
| N | -5.94989634 | -0.27680058 | 0.01703157  |
| C | -6.41133543 | -1.40763797 | 0.81016648  |
| O | -5.46658159 | 0.98821101  | 1.87039114  |
| C | -2.60769422 | 2.55392068  | 0.54857102  |
| C | -5.30168741 | -2.34298970 | 1.30957080  |
| S | -3.34684168 | -2.29947847 | -1.16788294 |
| S | -4.55388589 | -3.48009845 | 0.06184259  |
| S | -1.72407747 | 2.14851369  | -1.02988322 |
| S | -0.85117173 | 3.95858815  | -1.61098054 |
| S | 5.35464166  | -2.16094613 | -1.12162452 |
| S | 6.61865928  | -0.90842808 | -0.02097724 |
| H | -0.41471869 | -2.49334801 | -1.85246830 |
| H | -0.97272136 | -0.81349422 | -1.75905221 |
| H | 3.14542428  | -3.36806667 | 1.73684704  |
| H | 4.21481805  | -1.96670837 | 1.82342778  |
| H | 2.67304096  | -0.70257950 | 0.65416701  |
| H | 0.71578139  | -0.31434307 | -0.25578063 |
| H | -1.91524280 | -1.38135116 | 0.58091770  |
| H | -1.52753211 | -3.08815636 | 0.23354867  |
| H | 5.23611800  | -3.87008166 | 0.59735575  |
| H | 3.88140121  | -3.87753171 | -0.54894423 |
| H | 0.71255511  | 4.64994919  | 0.90976121  |
| H | 0.51626409  | 2.88892152  | 0.87057471  |
| H | 3.00873119  | 4.37842130  | 1.09531674  |
| H | 4.86480171  | 3.17603852  | 1.44527055  |
| H | 4.50224443  | 0.27138607  | 1.76147471  |
| H | 5.95360917  | 1.19692798  | 2.11820844  |
| H | 1.31324796  | 2.86350357  | -1.52137005 |
| H | 1.40411167  | 4.63439817  | -1.50121126 |
| H | 6.43210085  | 1.46732688  | -0.31636582 |
| H | 4.91495759  | 0.64755111  | -0.73042800 |
| H | -4.19997118 | 3.73735719  | -0.33278027 |
| H | -4.53334215 | 3.14142711  | 1.30395780  |
| H | -4.73704013 | 1.54238536  | -1.17077736 |
| H | -5.59753167 | -0.49632490 | -0.90324695 |
| H | -6.93144312 | -0.99707106 | 1.68026500  |
| H | -7.13578692 | -1.96948650 | 0.21246877  |
| H | -2.08615776 | 3.38683770  | 1.02732726  |
| H | -2.50716716 | 1.66975816  | 1.18657933  |
| H | -5.72389767 | -3.04601295 | 2.03902953  |
| H | -4.51657743 | -1.77757220 | 1.81760415  |

1-F<sup>r</sup> (model ) B3LYP/6-31(1)++G(d,p)

|   |             |             |             |
|---|-------------|-------------|-------------|
| F | 0.00000000  | 0.00000000  | 0.33953000  |
| C | 0.00000000  | 3.33289100  | -0.09094900 |
| O | 0.06270800  | 4.55349800  | -0.31162100 |
| N | 0.64993900  | 2.72969900  | 0.95948800  |
| N | -0.71536800 | 2.45262500  | -0.86169500 |
| C | 1.54004400  | 3.47387600  | 1.81594400  |
| C | -1.54670200 | 2.87133100  | -1.96255700 |
| C | 2.97019500  | 3.63692900  | 1.26911600  |
| C | -2.98188400 | 2.33336900  | -1.89029100 |
| C | -2.88636800 | -1.66644600 | -0.09094900 |
| O | -3.97479900 | -2.22244200 | -0.31162100 |
| N | -2.68895900 | -0.80198600 | 0.95948800  |
| N | -1.76635200 | -1.84584000 | -0.86169500 |
| C | -3.77848700 | -0.40322100 | 1.81594400  |
| C | -1.71329500 | -2.77514800 | -1.96255700 |
| C | -4.63477000 | 0.75380000  | 1.26911600  |
| C | -0.52981400 | -3.74907200 | -1.89029100 |
| C | 2.88636800  | -1.66644600 | -0.09094900 |
| O | 3.91209100  | -2.33105600 | -0.31162100 |
| N | 2.03901900  | -1.92771400 | 0.95948800  |
| N | 2.48172000  | -0.60678600 | -0.86169500 |
| C | 2.23844300  | -3.07065500 | 1.81594400  |
| C | 3.25999600  | -0.09618300 | -1.96255700 |
| C | 1.66457500  | -4.39072900 | 1.26911600  |
| C | 3.51169900  | 1.41570300  | -1.89029100 |
| S | -0.18634400 | -4.33212600 | 1.18290500  |
| S | -0.65743200 | -5.13762400 | -0.67949900 |
| S | -3.65855900 | 2.32744200  | 1.18290500  |
| S | -4.12059700 | 3.13816500  | -0.67949900 |
| S | 3.84490300  | 2.00468500  | 1.18290500  |
| S | 4.77802900  | 1.99945900  | -0.67949900 |
| H | 0.59674100  | 1.71345600  | 1.02005000  |
| H | -0.66658600 | 1.46788200  | -0.59266700 |
| H | 1.56460400  | 2.98480400  | 2.79689000  |
| H | 1.12523200  | 4.47856700  | 1.95506500  |
| H | -1.12259800 | 2.52353200  | -2.92114600 |
| H | -1.54189100 | 3.96440000  | -1.98092900 |
| H | 3.54879200  | 4.30760800  | 1.91468600  |
| H | 2.93644700  | 4.06300700  | 0.26440600  |
| H | -3.48255000 | 2.51645700  | -2.85023800 |
| H | -2.99557000 | 1.25247500  | -1.71836600 |
| H | -1.78226700 | -0.33993500 | 1.02005000  |
| H | -0.93793000 | -1.31122200 | -0.59266700 |
| H | -3.36721900 | -0.13741500 | 2.79689000  |
| H | -4.44116900 | -1.26480400 | 1.95506500  |
| H | -1.62414400 | -2.23396400 | -2.92114600 |
| H | -2.66232600 | -3.31751700 | -1.98092900 |
| H | -5.50489400 | 0.91954000  | 1.91468600  |
| H | -4.98689000 | 0.51153400  | 0.26440600  |
| H | -0.43804100 | -4.27420500 | -2.85023800 |
| H | 0.41311000  | -3.22047700 | -1.71836600 |
| H | 1.18552600  | -1.37352100 | 1.02005000  |
| H | 1.60451600  | -0.15666000 | -0.59266700 |
| H | 1.80261400  | -2.84738900 | 2.79689000  |
| H | 3.31593700  | -3.21376400 | 1.95506500  |
| H | 2.74674200  | -0.28956800 | -2.92114600 |
| H | 4.20421700  | -0.64688300 | -1.98092900 |
| H | 1.95610100  | -5.22714800 | 1.91468600  |
| H | 2.05044400  | -4.57454100 | 0.26440600  |
| H | 3.92059000  | 1.75774800  | -2.85023800 |
| H | 2.58246000  | 1.96800200  | -1.71836600 |

1-Cl (model ) B3LYP/6-31(1)++G(d,p)

|    |             |             |             |
|----|-------------|-------------|-------------|
| Cl | 0.00000000  | 0.00000000  | 0.42940900  |
| C  | 0.00000000  | 3.90398900  | -0.07318600 |
| O  | 0.12639900  | 5.09357800  | -0.40261900 |
| N  | 0.74827200  | 3.32755200  | 0.92840800  |
| N  | -0.91120800 | 3.05433500  | -0.64804100 |
| C  | 1.80268100  | 4.06384600  | 1.58662700  |
| C  | -1.68606100 | 3.44032600  | -1.80380600 |
| C  | 3.17702800  | 3.96580300  | 0.89974100  |
| C  | -3.07781900 | 2.80312300  | -1.82632700 |
| C  | -3.38095400 | -1.95199500 | -0.07318600 |
| O  | -4.47436800 | -2.43732400 | -0.40261900 |
| N  | -3.25588100 | -1.01575300 | 0.92840800  |
| N  | -2.18952700 | -2.31629700 | -0.64804100 |
| C  | -4.42073400 | -0.47075500 | 1.58662700  |
| C  | -2.13637900 | -3.18033500 | -1.80380600 |
| C  | -5.02300000 | 0.76848500  | 0.89974100  |
| C  | -0.88866600 | -4.06703100 | -1.82632700 |
| C  | 3.38095400  | -1.95199500 | -0.07318600 |
| O  | 4.34796800  | -2.65625400 | -0.40261900 |
| N  | 2.50760900  | -2.31179900 | 0.92840800  |
| N  | 3.10073600  | -0.73803800 | -0.64804100 |
| C  | 2.61805300  | -3.59309100 | 1.58662700  |
| C  | 3.82244000  | -0.25999200 | -1.80380600 |
| C  | 1.84597200  | -4.73428800 | 0.89974100  |
| C  | 3.96648500  | 1.26390800  | -1.82632700 |
| S  | 0.02260400  | -4.49470200 | 1.12340100  |
| S  | -0.82213600 | -5.40209500 | -0.55022600 |
| S  | -3.90382800 | 2.22777600  | 1.12340100  |
| S  | -4.26728400 | 3.41303800  | -0.55022600 |
| S  | 3.88122400  | 2.26692600  | 1.12340100  |
| S  | 5.08942000  | 1.98905700  | -0.55022600 |
| H  | 0.68517800  | 2.32163600  | 1.05695000  |
| H  | -0.84346200 | 2.06554000  | -0.41311900 |
| H  | 1.87248000  | 3.72515200  | 2.62770300  |
| H  | 1.51211800  | 5.11884200  | 1.59914400  |
| H  | -1.17902500 | 3.14705200  | -2.74123100 |
| H  | -1.75727100 | 4.53074900  | -1.80507300 |
| H  | 3.87003300  | 4.69762600  | 1.32867400  |
| H  | 3.06986400  | 4.16516000  | -0.16863000 |
| H  | -3.56317200 | 3.03869100  | -2.78152100 |
| H  | -3.02202400 | 1.71296100  | -1.74693400 |
| H  | -2.35318500 | -0.56743600 | 1.05695000  |
| H  | -1.36708000 | -1.76323000 | -0.41311900 |
| H  | -4.16231600 | -0.24096100 | 2.62770300  |
| H  | -5.18910600 | -1.24988900 | 1.59914400  |
| H  | -2.13591400 | -2.59459200 | -2.74123100 |
| H  | -3.04510800 | -3.78721600 | -1.80507300 |
| H  | -6.00328000 | 1.00273400  | 1.32867400  |
| H  | -5.14206600 | 0.57600000  | -0.16863000 |
| H  | -0.84999800 | -4.60514200 | -2.78152100 |
| H  | 0.02754400  | -3.47363000 | -1.74693400 |
| H  | 1.66800700  | -1.75420000 | 1.05695000  |
| H  | 2.21054100  | -0.30231100 | -0.41311900 |
| H  | 2.28983600  | -3.48419100 | 2.62770300  |
| H  | 3.67698800  | -3.86895400 | 1.59914400  |
| H  | 3.31494000  | -0.55246000 | -2.74123100 |
| H  | 4.80237900  | -0.74353300 | -1.80507300 |
| H  | 2.13324700  | -5.70036000 | 1.32867400  |
| H  | 2.07220300  | -4.74116000 | -0.16863000 |
| H  | 4.41316900  | 1.56645200  | -2.78152100 |
| H  | 2.99448000  | 1.76066900  | -1.74693400 |

1-Br<sup>-</sup> (model ) B3LYP/6-31(1)++G(d,p)

|    |             |             |             |
|----|-------------|-------------|-------------|
| Br | 0.00000000  | 0.00000000  | 0.39474900  |
| C  | 0.00000000  | 4.07908300  | -0.07783600 |
| O  | 0.14211200  | 5.26241500  | -0.42126400 |
| N  | 0.77243700  | 3.49189400  | 0.89943600  |
| N  | -0.95844600 | 3.25234800  | -0.61039500 |
| C  | 1.87995200  | 4.20423200  | 1.49619100  |
| C  | -1.73233100 | 3.65169600  | -1.76438800 |
| C  | 3.22422400  | 4.02557900  | 0.76703200  |
| C  | -3.10135200 | 2.97113000  | -1.82386600 |
| C  | -3.53259000 | -2.03954200 | -0.07783600 |
| O  | -4.62844100 | -2.50813500 | -0.42126400 |
| N  | -3.41028800 | -1.07699700 | 0.89943600  |
| N  | -2.33739300 | -2.45621300 | -0.61039500 |
| C  | -4.58094800 | -0.47402900 | 1.49619100  |
| C  | -2.29629600 | -3.32609100 | -1.76438800 |
| C  | -5.09836600 | 0.77947100  | 0.76703200  |
| C  | -1.02239800 | -4.17141500 | -1.82386600 |
| C  | 3.53259000  | -2.03954200 | -0.07783600 |
| O  | 4.48632900  | -2.75428000 | -0.42126400 |
| N  | 2.63785100  | -2.41489700 | 0.89943600  |
| N  | 3.29583900  | -0.79613500 | -0.61039500 |
| C  | 2.70099600  | -3.73020300 | 1.49619100  |
| C  | 4.02862700  | -0.32560500 | -1.76438800 |
| C  | 1.87414100  | -4.80504900 | 0.76703200  |
| C  | 4.12375000  | 1.20028500  | -1.82386600 |
| S  | 0.06842800  | -4.52612200 | 1.07062400  |
| S  | -0.86478000 | -5.48038300 | -0.52836200 |
| S  | -3.95395100 | 2.20380000  | 1.07062400  |
| S  | -4.31376100 | 3.48911300  | -0.52836200 |
| S  | 3.88552200  | 2.32232200  | 1.07062400  |
| S  | 5.17854100  | 1.99127100  | -0.52836200 |
| H  | 0.70219900  | 2.48692600  | 1.02951400  |
| H  | -0.89196800 | 2.25932900  | -0.39582200 |
| H  | 1.97318900  | 3.90003800  | 2.54620400  |
| H  | 1.63065300  | 5.26926200  | 1.47954600  |
| H  | -1.20533600 | 3.40729600  | -2.70464000 |
| H  | -1.84000300 | 4.73861500  | -1.73223500 |
| H  | 3.95310800  | 4.75858500  | 1.12860500  |
| H  | 3.08270700  | 4.16668700  | -0.30676000 |
| H  | -3.58650100 | 3.23155600  | -2.77242500 |
| H  | -3.01099400 | 1.88106700  | -1.78955200 |
| H  | -2.50484000 | -0.63534100 | 1.02951400  |
| H  | -1.51065200 | -1.90213100 | -0.39582200 |
| H  | -4.36412700 | -0.24118700 | 2.54620400  |
| H  | -5.37864200 | -1.22244400 | 1.47954600  |
| H  | -2.34813600 | -2.74750000 | -2.70464000 |
| H  | -3.18375900 | -3.96279700 | -1.73223500 |
| H  | -6.09760900 | 1.04420000  | 1.12860500  |
| H  | -5.14981000 | 0.58635900  | -0.30676000 |
| H  | -1.00535900 | -4.72177900 | -2.77242500 |
| H  | -0.12355500 | -3.54813000 | -1.78955200 |
| H  | 1.80264200  | -1.85158500 | 1.02951400  |
| H  | 2.40262000  | -0.35719800 | -0.39582200 |
| H  | 2.39093700  | -3.65885100 | 2.54620400  |
| H  | 3.74798800  | -4.04681800 | 1.47954600  |
| H  | 3.55347300  | -0.65979600 | -2.70464000 |
| H  | 5.02376300  | -0.77581800 | -1.73223500 |
| H  | 2.14450100  | -5.80278500 | 1.12860500  |
| H  | 2.06710300  | -4.75304600 | -0.30676000 |
| H  | 4.59186000  | 1.49022300  | -2.77242500 |
| H  | 3.13454800  | 1.66706400  | -1.78955200 |

1-Γ (model ) B3LYP/6-31(1)++G(d,p)

|   |             |             |             |
|---|-------------|-------------|-------------|
| I | 0.00000000  | 0.00000000  | 1.43711900  |
| C | 1.61369900  | 3.66761900  | -0.26363900 |
| O | 2.22663200  | 4.55896600  | -0.87066600 |
| N | 2.12161800  | 3.05507600  | 0.85658400  |
| N | 0.36322900  | 3.23486600  | -0.63986400 |
| C | 3.46216100  | 3.34634900  | 1.31562100  |
| C | -0.19273200 | 3.63325500  | -1.91639700 |
| C | 4.58350600  | 2.65327000  | 0.51972200  |
| C | -1.71158600 | 3.47523300  | -1.98436800 |
| C | -3.98310000 | -0.43630500 | -0.26363900 |
| O | -5.06149600 | -0.35116300 | -0.87066600 |
| N | -3.70658200 | 0.30983700  | 0.85658400  |
| N | -2.98309000 | -1.30286700 | -0.63986400 |
| C | -4.62910400 | 1.32514500  | 1.31562100  |
| C | -3.05012500 | -1.98353800 | -1.91639700 |
| C | -4.58955200 | 2.64279800  | 0.51972200  |
| C | -2.15384700 | -3.21989300 | -1.98436800 |
| C | 2.36940100  | -3.23131400 | -0.26363900 |
| O | 2.83486400  | -4.20780300 | -0.87066600 |
| N | 1.58496400  | -3.36491300 | 0.85658400  |
| N | 2.61986100  | -1.93199800 | -0.63986400 |
| C | 1.16694200  | -4.67149400 | 1.31562100  |
| C | 3.24285700  | -1.64971700 | -1.91639700 |
| C | 0.00604600  | -5.29606800 | 0.51972200  |
| C | 3.86543300  | -0.25534000 | -1.98436800 |
| S | -1.57600000 | -4.38589600 | 0.83964600  |
| S | -2.66335900 | -4.64239900 | -0.91856000 |
| S | -3.01029700 | 3.55780400  | 0.83964600  |
| S | -2.68875600 | 4.62773600  | -0.91856000 |
| S | 4.58629700  | 0.82809200  | 0.83964600  |
| S | 5.35211500  | 0.01466300  | -0.91856000 |
| H | 1.65078800  | 2.22866800  | 1.21449000  |
| H | 0.00000000  | 2.39605100  | -0.19503900 |
| H | 3.52224400  | 3.08034100  | 2.37700000  |
| H | 3.62517000  | 4.42616400  | 1.23439600  |
| H | 0.23562400  | 3.03760300  | -2.74266500 |
| H | 0.09547100  | 4.67211100  | -2.09567200 |
| H | 5.55693000  | 3.06415300  | 0.80825600  |
| H | 4.43254400  | 2.82463500  | -0.54773700 |
| H | -2.04042400 | 3.69101200  | -3.00771600 |
| H | -2.02504000 | 2.45352200  | -1.74914100 |
| H | -2.75547700 | 0.31529100  | 1.21449000  |
| H | -2.07504100 | -1.19802600 | -0.19503900 |
| H | -4.42877600 | 1.51018200  | 2.37700000  |
| H | -5.64575500 | 0.92640700  | 1.23439600  |
| H | -2.74845300 | -1.31474500 | -2.74266500 |
| H | -4.09390200 | -2.25337500 | -2.09567200 |
| H | -5.43209900 | 3.28036700  | 0.80825600  |
| H | -4.66247700 | 2.42637800  | -0.54773700 |
| H | -2.17629800 | -3.61256500 | -3.00771600 |
| H | -1.11229200 | -2.98049700 | -1.74914100 |
| H | 1.10468900  | -2.54395900 | 1.21449000  |
| H | 2.07504100  | -1.19802600 | -0.19503900 |
| H | 0.90653200  | -4.59052300 | 2.37700000  |
| H | 2.02058500  | -5.35257100 | 1.23439600  |
| H | 2.51282900  | -1.72285800 | -2.74266500 |
| H | 3.99843100  | -2.41873500 | -2.09567200 |
| H | -0.12483100 | -6.34451900 | 0.80825600  |
| H | 0.22993400  | -5.25101300 | -0.54773700 |
| H | 4.21672200  | -0.07844700 | -3.00771600 |
| H | 3.13733300  | 0.52697500  | -1.74914100 |

**1- NO<sub>3</sub><sup>-</sup> (model ) B3LYP/6-31(1)++G(d,p)**

|   |             |             |             |
|---|-------------|-------------|-------------|
| N | 0.00000000  | 0.00000000  | 0.35640000  |
| O | 1.12202100  | 0.56393800  | 0.35467100  |
| O | -0.07262600 | -1.25366800 | 0.35467100  |
| O | -1.04939500 | 0.68973000  | 0.35467100  |
| C | 0.00000000  | 4.33044300  | 0.08820900  |
| O | -0.05667800 | 5.56485900  | 0.20021100  |
| N | -0.91774700 | 3.60419400  | -0.64081500 |
| N | 0.99511700  | 3.57675300  | 0.65643600  |
| C | -2.00658200 | 4.26104800  | -1.33159000 |
| C | 1.90847700  | 4.14740100  | 1.62087500  |
| C | -3.39447000 | 3.97531200  | -0.73661900 |
| C | 3.28178400  | 3.47273700  | 1.61703600  |
| C | 3.75027400  | -2.16522200 | 0.08820900  |
| O | 4.84764800  | -2.73334500 | 0.20021100  |
| N | 3.58019700  | -1.00730500 | -0.64081500 |
| N | 2.60000000  | -2.65017400 | 0.65643600  |
| C | 4.69346700  | -0.39277300 | -1.33159000 |
| C | 2.63751600  | -3.72649000 | 1.62087500  |
| C | 5.13995600  | 0.95204100  | -0.73661900 |
| C | 1.36658600  | -4.57847700 | 1.61703600  |
| C | -3.75027400 | -2.16522200 | 0.08820900  |
| O | -4.79097000 | -2.83151400 | 0.20021100  |
| N | -2.66245000 | -2.59688900 | -0.64081500 |
| N | -3.59511800 | -0.92657900 | 0.65643600  |
| C | -2.68688500 | -3.86827500 | -1.33159000 |
| C | -4.54599300 | -0.42091100 | 1.62087500  |
| C | -1.74548600 | -4.92735300 | -0.73661900 |
| C | -4.64837100 | 1.10574000  | 1.61703600  |
| S | 0.00767200  | -4.53194600 | -1.19027000 |
| S | 1.13327100  | -5.66898200 | 0.14145600  |
| S | 3.92094400  | 2.27261800  | -1.19027000 |
| S | 4.34284700  | 3.81593200  | 0.14145600  |
| S | -3.92861700 | 2.25932900  | -1.19027000 |
| S | -5.47611800 | 1.85305000  | 0.14145600  |
| H | -0.95040600 | 2.59736200  | -0.51224200 |
| H | 0.97338400  | 2.56440300  | 0.55385800  |
| H | -1.99702300 | 3.99274800  | -2.39822500 |
| H | -1.81466800 | 5.33533000  | -1.26140400 |
| H | 1.50800300  | 4.05996500  | 2.64744800  |
| H | 1.99921600  | 5.21459700  | 1.40352200  |
| H | -4.13005600 | 4.68478700  | -1.12891900 |
| H | -3.36041000 | 4.06056900  | 0.35223900  |
| H | 3.86353000  | 3.84996600  | 2.46667500  |
| H | 3.19805200  | 2.38756500  | 1.73061200  |
| H | 2.72458500  | -0.47560500 | -0.51224200 |
| H | 1.73414600  | -2.12517700 | 0.55385800  |
| H | 4.45633300  | -0.26690100 | -2.39822500 |
| H | 5.52786500  | -1.09611700 | -1.26140400 |
| H | 2.76203200  | -3.33595100 | 2.64744800  |
| H | 3.51636600  | -4.33867000 | 1.40352200  |
| H | 6.12217200  | 1.23434000  | -1.12891900 |
| H | 5.19676100  | 0.87991600  | 0.35223900  |
| H | 1.40240400  | -5.27089800 | 2.46667500  |
| H | 0.46866600  | -3.96337700 | 1.73061200  |
| H | -1.77417900 | -2.12175700 | -0.51224200 |
| H | -2.70753100 | -0.43922600 | 0.55385800  |
| H | -2.45931000 | -3.72584700 | -2.39822500 |
| H | -3.71319800 | -4.23921300 | -1.26140400 |
| H | -4.27003500 | -0.72401400 | 2.64744800  |
| H | -5.51558100 | -0.87592700 | 1.40352200  |
| H | -1.99211600 | -5.91912700 | -1.12891900 |

|                                                       |             |             |             |
|-------------------------------------------------------|-------------|-------------|-------------|
| H                                                     | -1.83635100 | -4.94048500 | 0.35223900  |
| H                                                     | -5.26593300 | 1.42093200  | 2.46667500  |
| H                                                     | -3.66671800 | 1.57581200  | 1.73061200  |
| <b>1-F<sup>-</sup> (model ) B3LYP/6-31(1)++G(d,p)</b> |             |             |             |
| C                                                     | -0.80679000 | 3.52535400  | -0.65430000 |
| C                                                     | 3.29566100  | 2.66524200  | 1.81572800  |
| N                                                     | 2.14098200  | 2.21819500  | 1.06082000  |
| C                                                     | 1.36250500  | 3.15083400  | 0.39620500  |
| N                                                     | 0.24725300  | 2.62774900  | -0.19802300 |
| O                                                     | 1.68594700  | 4.34572800  | 0.32952100  |
| C                                                     | -1.84879000 | 2.73966400  | -1.45070400 |
| C                                                     | 4.52145900  | 3.00998200  | 0.95442800  |
| C                                                     | 0.66033600  | -4.18674700 | 1.81572800  |
| N                                                     | 0.85052200  | -2.96324200 | 1.06082000  |
| C                                                     | 2.04745000  | -2.75538100 | 0.39620500  |
| N                                                     | 2.15207100  | -1.52800200 | -0.19802300 |
| C                                                     | 3.45644100  | -1.06397600 | -0.65430000 |
| O                                                     | 2.92053700  | -3.63293700 | 0.32952100  |
| C                                                     | 0.34599200  | -5.42068900 | 0.95442800  |
| C                                                     | 3.29701400  | 0.23126700  | -1.45070400 |
| C                                                     | -2.64965100 | -2.46137800 | -0.65430000 |
| N                                                     | -2.39932400 | -1.09974700 | -0.19802300 |
| C                                                     | -3.40995500 | -0.39545300 | 0.39620500  |
| N                                                     | -2.99150400 | 0.74504700  | 1.06082000  |
| C                                                     | -3.95599700 | 1.52150500  | 1.81572800  |
| O                                                     | -4.60648400 | -0.71279100 | 0.32952100  |
| C                                                     | -1.44822300 | -2.97093100 | -1.45070400 |
| C                                                     | -4.86745000 | 2.41070700  | 0.95442800  |
| S                                                     | 5.48886100  | 1.56528300  | 0.32436700  |
| S                                                     | 4.85535900  | 1.20021200  | -1.63029500 |
| S                                                     | -1.38885600 | -5.53613500 | 0.32436700  |
| S                                                     | -1.38826500 | -4.80497100 | -1.63029500 |
| S                                                     | -4.10000500 | 3.97085200  | 0.32436700  |
| S                                                     | -3.46709400 | 3.60475800  | -1.63029500 |
| H                                                     | -1.29330300 | 4.01303200  | 0.20095100  |
| H                                                     | -0.36366900 | 4.31771300  | -1.26332900 |
| H                                                     | 3.03798700  | 3.57223700  | 2.38096500  |
| H                                                     | 3.55348500  | 1.87931800  | 2.53228300  |
| H                                                     | 1.69044800  | 1.34026800  | 1.29906700  |
| H                                                     | 0.00000000  | 1.66799300  | 0.07275600  |
| H                                                     | -2.04581800 | 1.76810100  | -0.99501100 |
| H                                                     | -1.52622200 | 2.57139700  | -2.48492000 |
| H                                                     | 5.24431200  | 3.56453200  | 1.56607100  |
| H                                                     | 4.23335300  | 3.64618200  | 0.11494800  |
| H                                                     | 1.57465400  | -4.41709200 | 2.38096500  |
| H                                                     | -0.14920600 | -4.01706700 | 2.53228300  |
| H                                                     | 0.31548200  | -2.13410500 | 1.29906700  |
| H                                                     | 1.44452500  | -0.83399700 | 0.07275600  |
| H                                                     | 4.12203900  | -0.88648300 | 0.20095100  |
| H                                                     | 3.92108400  | -1.84391000 | -1.26332900 |
| H                                                     | 0.46481900  | -6.32397300 | 1.56607100  |
| H                                                     | 1.04101000  | -5.48928200 | 0.11494800  |
| H                                                     | 2.55413000  | 0.88768000  | -0.99501100 |
| H                                                     | 2.99000600  | 0.03604800  | -2.48492000 |
| H                                                     | -2.82873600 | -3.12654900 | 0.20095100  |
| H                                                     | -3.55741500 | -2.47380300 | -1.26332900 |
| H                                                     | -1.44452500 | -0.83399700 | 0.07275600  |
| H                                                     | -2.00593000 | 0.79383700  | 1.29906700  |
| H                                                     | -3.40427900 | 2.13775000  | 2.53228300  |
| H                                                     | -4.61264100 | 0.84485500  | 2.38096500  |
| H                                                     | -0.50831100 | -2.65578100 | -0.99501100 |
| H                                                     | -1.46378400 | -2.60744600 | -2.48492000 |
| H                                                     | -5.70913100 | 2.75944100  | 1.56607100  |
| H                                                     | -5.27436300 | 1.84310000  | 0.11494800  |
| F                                                     | 0.00000000  | 0.00000000  | 0.80906100  |

1-Cl (model ) B3LYP/6-31(1)++G(d,p)

|    |             |             |             |
|----|-------------|-------------|-------------|
| C  | -2.11567100 | 3.14091000  | -0.43994800 |
| C  | 2.18821900  | 4.28832600  | 1.56113900  |
| N  | 1.24019700  | 3.32410600  | 1.03304500  |
| C  | 0.12543000  | 3.77755400  | 0.34764700  |
| N  | -0.78335700 | 2.80049100  | 0.03699500  |
| O  | 0.00000000  | 4.96516500  | 0.02072600  |
| C  | -2.68143200 | 1.98787300  | -1.27059400 |
| C  | 3.20666500  | 4.80823700  | 0.53565500  |
| C  | 2.61969000  | -4.03921600 | 1.56113900  |
| N  | 2.25866100  | -2.73609500 | 1.03304500  |
| C  | 3.20874300  | -1.99740300 | 0.34764700  |
| N  | 2.81697500  | -0.72183800 | 0.03699500  |
| C  | 3.77794300  | 0.26177000  | -0.43994800 |
| O  | 4.29995900  | -2.48258200 | 0.02072600  |
| C  | 2.56072300  | -5.18117200 | 0.53565500  |
| C  | 3.06226500  | 1.32825100  | -1.27059400 |
| C  | -1.66227200 | -3.40268000 | -0.43994800 |
| N  | -2.03361800 | -2.07865300 | 0.03699500  |
| C  | -3.33417300 | -1.78015100 | 0.34764700  |
| N  | -3.49885900 | -0.58801100 | 1.03304500  |
| C  | -4.80790800 | -0.24911000 | 1.56113900  |
| O  | -4.29995900 | -2.48258200 | 0.02072600  |
| C  | -0.38083300 | -3.31612500 | -1.27059400 |
| C  | -5.76738800 | 0.37293500  | 0.53565500  |
| S  | 4.59162900  | 3.64958700  | 0.13191500  |
| S  | 4.12302800  | 2.77014900  | -1.70122200 |
| S  | 0.86482100  | -5.80126100 | 0.13191500  |
| S  | 0.33750500  | -4.95572100 | -1.70122200 |
| S  | -5.45645000 | 2.15167400  | 0.13191500  |
| S  | -4.46053300 | 2.18557200  | -1.70122200 |
| H  | -2.79097700 | 3.34714400  | 0.40203000  |
| H  | -2.04259200 | 4.05447000  | -1.03339700 |
| H  | 1.64266400  | 5.16187800  | 1.94325800  |
| H  | 2.71088200  | 3.81982800  | 2.40086400  |
| H  | 1.17181000  | 2.41666700  | 1.48016300  |
| H  | -0.66828100 | 1.89806400  | 0.49817400  |
| H  | -2.56348000 | 1.03015500  | -0.75824700 |
| H  | -2.17767300 | 1.91806500  | -2.24185500 |
| H  | 3.70663700  | 5.69462800  | 0.94536900  |
| H  | 2.70631500  | 5.10098600  | -0.38986400 |
| H  | 3.64898600  | -4.00352800 | 1.94325800  |
| H  | 1.95262700  | -4.25760600 | 2.40086400  |
| H  | 1.50699000  | -2.22315100 | 1.48016300  |
| H  | 1.97791200  | -0.37028400 | 0.49817400  |
| H  | 4.29420000  | 0.74348500  | 0.40203000  |
| H  | 4.53257000  | -0.25829900 | -1.03339700 |
| H  | 3.07837400  | -6.05735600 | 0.94536900  |
| H  | 3.06442600  | -4.89423100 | -0.38986400 |
| H  | 2.17388000  | 1.70496200  | -0.75824700 |
| H  | 2.74993000  | 0.92688800  | -2.24185500 |
| H  | -1.50322300 | -4.09062900 | 0.40203000  |
| H  | -2.48997800 | -3.79617100 | -1.03339700 |
| H  | -1.30963100 | -1.52778000 | 0.49817400  |
| H  | -2.67880000 | -0.19351600 | 1.48016300  |
| H  | -4.66350900 | 0.43777800  | 2.40086400  |
| H  | -5.29165000 | -1.15835100 | 1.94325800  |
| H  | 0.38960000  | -2.73511700 | -0.75824700 |
| H  | -0.57225700 | -2.84495300 | -2.24185500 |
| H  | -6.78501100 | 0.36272800  | 0.94536900  |
| H  | -5.77074100 | -0.20675500 | -0.38986400 |
| Cl | 0.00000000  | 0.00000000  | 1.72993100  |



1-Br<sup>-</sup> (model ) B3LYP/6-31(1)++G(d,p)

|    |             |             |             |
|----|-------------|-------------|-------------|
| C  | -1.20025400 | 3.60460400  | -0.49697700 |
| C  | 3.31126100  | 3.63759300  | 1.37610800  |
| N  | 2.12730900  | 2.93837800  | 0.90847600  |
| C  | 1.15560600  | 3.64368200  | 0.21890200  |
| N  | 0.00000000  | 2.94223800  | -0.00883600 |
| O  | 1.35089400  | 4.79851800  | -0.18150500 |
| C  | -2.02194000 | 2.64257500  | -1.35673100 |
| C  | 4.40902900  | 3.81370200  | 0.31678600  |
| C  | 1.49461700  | -4.68643200 | 1.37610800  |
| N  | 1.48105600  | -3.31149300 | 0.90847600  |
| C  | 2.57771800  | -2.82262500 | 0.21890200  |
| N  | 2.54805300  | -1.47111900 | -0.00883600 |
| C  | 3.72180500  | -0.76285100 | -0.49697700 |
| O  | 3.48019200  | -3.56916800 | -0.18150500 |
| C  | 1.09824800  | -5.72518200 | 0.31678600  |
| C  | 3.29950700  | 0.42976400  | -1.35673100 |
| C  | -2.52155100 | -2.84175300 | -0.49697700 |
| N  | -2.54805300 | -1.47111900 | -0.00883600 |
| C  | -3.73332400 | -0.82105700 | 0.21890200  |
| N  | -3.60836500 | 0.37311500  | 0.90847600  |
| C  | -4.80587800 | 1.04883900  | 1.37610800  |
| O  | -4.83108600 | -1.22935100 | -0.18150500 |
| C  | -1.27756700 | -3.07233900 | -1.35673100 |
| C  | -5.50727700 | 1.91148000  | 0.31678600  |
| S  | 5.41357000  | 2.30226300  | -0.04289800 |
| S  | 4.69895800  | 1.52378400  | -1.84192200 |
| S  | -0.71296700 | -5.83942100 | -0.04289800 |
| S  | -1.02984300 | -4.83130900 | -1.84192200 |
| S  | -4.70060300 | 3.53715800  | -0.04289800 |
| S  | -3.66911500 | 3.30752500  | -1.84192200 |
| H  | -1.81755000 | 3.95824100  | 0.34029500  |
| H  | -0.89121400 | 4.47901600  | -1.07275300 |
| H  | 3.02840000  | 4.64295100  | 1.71647400  |
| H  | 3.70729000  | 3.08708000  | 2.23510700  |
| H  | 1.83065300  | 2.10862000  | 1.41001100  |
| H  | -0.12547800 | 2.07210900  | 0.50651100  |
| H  | -2.17775900 | 1.68623200  | -0.85174900 |
| H  | -1.52147500 | 2.44591000  | -2.31219500 |
| H  | 5.14060200  | 4.54663000  | 0.67873600  |
| H  | 3.98725500  | 4.19134800  | -0.61702000 |
| H  | 2.50671400  | -4.94414700 | 1.71647400  |
| H  | 0.81984500  | -4.75414700 | 2.23510700  |
| H  | 0.91079200  | -2.63970200 | 1.41001100  |
| H  | 1.85723800  | -0.92738700 | 0.50651100  |
| H  | 4.33671300  | -0.40507600 | 0.34029500  |
| H  | 4.32454800  | -1.46769400 | -1.07275300 |
| H  | 1.36719700  | -6.72520700 | 0.67873600  |
| H  | 1.63618600  | -5.54873800 | -0.61702000 |
| H  | 2.54919900  | 1.04287800  | -0.85174900 |
| H  | 2.87895800  | 0.09468000  | -2.31219500 |
| H  | -2.51916200 | -3.55316500 | 0.34029500  |
| H  | -3.43333400 | -3.01132200 | -1.07275300 |
| H  | -1.73176000 | -1.14472200 | 0.50651100  |
| H  | -2.74144500 | 0.53108200  | 1.41001100  |
| H  | -4.52713400 | 1.66706700  | 2.23510700  |
| H  | -5.53511400 | 0.30119600  | 1.71647400  |
| H  | -0.37144000 | -2.72911000 | -0.85174900 |
| H  | -1.35748300 | -2.54059100 | -2.31219500 |
| H  | -6.50779800 | 2.17857600  | 0.67873600  |
| H  | -5.62344200 | 1.35739000  | -0.61702000 |
| Br | 0.00000000  | 0.00000000  | 1.96540500  |

1-I (model ) B3LYP/6-31(1)++G(d,p)

|   |             |             |             |
|---|-------------|-------------|-------------|
| C | -2.24628100 | 3.10546200  | -0.60185900 |
| C | 2.06977400  | 4.59725000  | 1.14572200  |
| N | 1.14567300  | 3.54868200  | 0.74908700  |
| C | 0.00000000  | 3.88759500  | 0.05012300  |
| N | -0.90691600 | 2.86740300  | -0.08563000 |
| O | -0.15505800 | 5.01507500  | -0.43556100 |
| C | -2.70926900 | 1.92131300  | -1.45394400 |
| C | 3.05450400  | 5.02951700  | 0.05014500  |
| C | 2.94644800  | -4.09110100 | 1.14572200  |
| N | 2.50041200  | -2.76652300 | 0.74908700  |
| C | 3.36675600  | -1.94379800 | 0.05012300  |
| N | 2.93670200  | -0.64828900 | -0.08563000 |
| C | 3.81254900  | 0.39260600  | -0.60185900 |
| O | 4.42071100  | -2.37325300 | -0.43556100 |
| C | 2.82843800  | -5.16003700 | 0.05014500  |
| C | 3.01854000  | 1.38563900  | -1.45394400 |
| C | -1.56626800 | -3.49806700 | -0.60185900 |
| N | -2.02978600 | -2.21911300 | -0.08563000 |
| C | -3.36675600 | -1.94379800 | 0.05012300  |
| N | -3.64608500 | -0.78215900 | 0.74908700  |
| C | -5.01622200 | -0.50614800 | 1.14572200  |
| O | -4.26565300 | -2.64182200 | -0.43556100 |
| C | -0.30927100 | -3.30695200 | -1.45394400 |
| C | -5.88294200 | 0.13052000  | 0.05014500  |
| S | 4.46277300  | 3.86811100  | -0.25386100 |
| S | 4.00873800  | 2.83504600  | -2.00898600 |
| S | 1.11849600  | -5.79893100 | -0.25386100 |
| S | 0.45085300  | -4.88919200 | -2.00898600 |
| S | -5.58126900 | 1.93081900  | -0.25386100 |
| S | -4.45959100 | 2.05414600  | -2.00898600 |
| H | -2.95699600 | 3.25980300  | 0.22135300  |
| H | -2.21638600 | 4.02318000  | -1.19198000 |
| H | 1.50145600  | 5.49063300  | 1.43794900  |
| H | 2.61939300  | 4.24290700  | 2.02327600  |
| H | 1.11978600  | 2.70226600  | 1.30628900  |
| H | -0.77367800 | 2.04229400  | 0.49516700  |
| H | -2.59210200 | 0.97303300  | -0.92354900 |
| H | -2.13522200 | 1.86435100  | -2.38625700 |
| H | 3.53413900  | 5.96883100  | 0.35157400  |
| H | 2.53043900  | 5.20493500  | -0.89169100 |
| H | 4.00429900  | -4.04561500 | 1.43794900  |
| H | 2.36476900  | -4.38991500 | 2.02327600  |
| H | 1.78033800  | -2.32089600 | 1.30628900  |
| H | 2.15551700  | -0.35112200 | 0.49516700  |
| H | 4.30157000  | 0.93093200  | 0.22135300  |
| H | 4.59236900  | -0.09214300 | -1.19198000 |
| H | 3.40209000  | -6.04507000 | 0.35157400  |
| H | 3.24238600  | -4.79389200 | -0.89169100 |
| H | 2.13872300  | 1.75830900  | -0.92354900 |
| H | 2.68218600  | 0.91698100  | -2.38625700 |
| H | -1.34457500 | -4.19073500 | 0.22135300  |
| H | -2.37598300 | -3.93103600 | -1.19198000 |
| H | -1.38183900 | -1.69117200 | 0.49516700  |
| H | -2.90012400 | -0.38137000 | 1.30628900  |
| H | -4.98416200 | 0.14700700  | 2.02327600  |
| H | -5.50575500 | -1.44501800 | 1.43794900  |
| H | 0.45337900  | -2.73134300 | -0.92354900 |
| H | -0.54696400 | -2.78133200 | -2.38625700 |
| H | -6.93622900 | 0.07623900  | 0.35157400  |
| H | -5.77282500 | -0.41104300 | -0.89169100 |
| I | 0.00000000  | 0.00000000  | 2.23373200  |

**1- NO<sub>3</sub><sup>-</sup> (model ) B3LYP/6-31(1)++G(d,p)**

|   |             |             |             |
|---|-------------|-------------|-------------|
| C | -3.94111200 | 0.37717100  | -0.35224700 |
| C | -2.16274700 | 4.63179500  | 1.29413400  |
| N | -2.01393500 | 3.23143000  | 0.94682300  |
| C | -3.02844100 | 2.58678500  | 0.26825100  |
| N | -2.90353900 | 1.22062300  | 0.21822200  |
| O | -3.95439500 | 3.21273700  | -0.26601800 |
| C | -3.31737200 | -0.72895300 | -1.20988400 |
| C | -1.80837900 | 5.62477700  | 0.17584900  |
| C | 5.09262500  | -0.44290400 | 1.29413400  |
| N | 3.80546700  | 0.12840400  | 0.94682300  |
| C | 3.75444200  | 1.32931400  | 0.26825100  |
| N | 2.50886000  | 1.90422700  | 0.21822200  |
| C | 2.29719600  | 3.22451700  | -0.35224700 |
| O | 4.75950900  | 1.81823800  | -0.26601800 |
| C | 5.77539000  | -1.24628600 | 0.17584900  |
| C | 1.02739400  | 3.23740500  | -1.20988400 |
| C | 1.64391600  | -3.60168800 | -0.35224700 |
| N | 0.39467900  | -3.12485000 | 0.21822200  |
| C | -0.72600100 | -3.91609900 | 0.26825100  |
| N | -1.79153300 | -3.35983300 | 0.94682300  |
| C | -2.92987900 | -4.18889100 | 1.29413400  |
| O | -0.80511500 | -5.03097500 | -0.26601800 |
| C | 2.28997800  | -2.50845200 | -1.20988400 |
| C | -3.96701100 | -4.37849100 | 0.17584900  |
| S | 0.00000000  | 5.93912400  | -0.06958700 |
| S | 0.55197000  | 4.91493500  | -1.80161200 |
| S | 5.14343200  | -2.96956200 | -0.06958700 |
| S | 3.98047400  | -2.93548800 | -1.80161200 |
| S | -5.14343200 | -2.96956200 | -0.06958700 |
| S | -4.53244400 | -1.97944800 | -1.80161200 |
| H | -4.54651600 | -0.07887300 | 0.44257000  |
| H | -4.59790100 | 1.01187100  | -0.94988900 |
| H | -3.20969300 | 4.82054000  | 1.56647700  |
| H | -1.54429000 | 4.82682600  | 2.17619000  |
| H | -1.32633700 | 2.67017900  | 1.43735700  |
| H | -2.27619400 | 0.76994900  | 0.87931100  |
| H | -2.52297900 | -1.25304700 | -0.67270900 |
| H | -2.88820200 | -0.31234500 | -2.12888400 |
| H | -2.22310200 | 6.60840600  | 0.42805300  |
| H | -2.24541400 | 5.30720300  | -0.77305100 |
| H | 5.77955700  | 0.36940600  | 1.56647700  |
| H | 4.95229900  | -1.07601900 | 2.17619000  |
| H | 2.97561100  | -0.18644800 | 1.43735700  |
| H | 1.80489200  | 1.58626700  | 0.87931100  |
| H | 2.20495200  | 3.97683500  | 0.44257000  |
| H | 3.17525700  | 3.47596300  | -0.94988900 |
| H | 6.83459900  | -1.37894000 | 0.42805300  |
| H | 5.71888000  | -0.70901600 | -0.77305100 |
| H | 0.17631900  | 2.81148700  | -0.67270900 |
| H | 1.17360200  | 2.65742900  | -2.12888400 |
| H | 2.34156400  | -3.89796200 | 0.44257000  |
| H | 1.42264400  | -4.48783500 | -0.94988900 |
| H | 0.47130100  | -2.35621600 | 0.87931100  |
| H | -1.64927500 | -2.48373100 | 1.43735700  |
| H | -3.40800900 | -3.75080800 | 2.17619000  |
| H | -2.56986300 | -5.18994600 | 1.56647700  |
| H | 2.34666000  | -1.55844000 | -0.67270900 |
| H | 1.71460000  | -2.34508400 | -2.12888400 |
| H | -4.61149700 | -5.22946600 | 0.42805300  |
| H | -3.47346600 | -4.59818700 | -0.77305100 |
| N | 0.00000000  | 0.00000000  | 1.98324000  |

|                                                       |             |             |             |
|-------------------------------------------------------|-------------|-------------|-------------|
| O                                                     | -1.15746600 | -0.48825400 | 1.97780000  |
| O                                                     | 1.00157300  | -0.75826800 | 1.97780000  |
| O                                                     | 0.15589300  | 1.24652200  | 1.97780000  |
| <b>1-F<sup>-</sup> (model ) B3LYP/6-31(1)++G(d,p)</b> |             |             |             |
| C                                                     | -3.10316500 | -1.05198000 | -1.96224400 |
| C                                                     | -2.38777500 | 2.92048300  | 0.73547300  |
| N                                                     | -1.90633400 | 1.67002100  | 0.17846700  |
| C                                                     | -2.66183000 | 1.06984000  | -0.80205800 |
| N                                                     | -2.27830500 | -0.20666900 | -1.12457000 |
| O                                                     | -3.60684200 | 1.64587500  | -1.36874400 |
| C                                                     | -4.48257100 | -1.39973500 | -1.37989300 |
| C                                                     | -1.55371100 | 3.42309200  | 1.90641100  |
| C                                                     | 3.72310000  | 0.60763200  | 0.73547300  |
| N                                                     | 2.39944700  | 0.81592300  | 0.17846700  |
| C                                                     | 2.25742400  | 1.77029300  | -0.80205800 |
| N                                                     | 0.96017200  | 2.07640400  | -1.12457000 |
| C                                                     | 0.64054100  | 3.21341000  | -1.96224400 |
| O                                                     | 3.22879100  | 2.30067900  | -1.36874400 |
| C                                                     | 3.74134000  | -0.36599300 | 1.90641100  |
| C                                                     | 1.02908000  | 4.58188800  | -1.37989300 |
| C                                                     | 2.46262400  | -2.16142900 | -1.96224400 |
| N                                                     | 1.31813300  | -1.86973600 | -1.12457000 |
| C                                                     | 0.40440700  | -2.84013300 | -0.80205800 |
| N                                                     | -0.49311400 | -2.48594400 | 0.17846700  |
| C                                                     | -1.33532500 | -3.52811500 | 0.73547300  |
| O                                                     | 0.37805100  | -3.94655400 | -1.36874400 |
| C                                                     | 3.45349100  | -3.18215300 | -1.37989300 |
| C                                                     | -2.18762900 | -3.05709900 | 1.90641100  |
| S                                                     | 0.17137300  | 4.03796000  | 1.60387400  |
| S                                                     | 0.00000000  | 5.33409900  | -0.03823900 |
| S                                                     | 3.41128900  | -2.16739300 | 1.60387400  |
| S                                                     | 4.61946600  | -2.66705000 | -0.03823900 |
| S                                                     | -3.58266200 | -1.87056700 | 1.60387400  |
| S                                                     | -4.61946600 | -2.66705000 | -0.03823900 |
| H                                                     | -3.28682700 | -0.53537600 | -2.91311100 |
| H                                                     | -2.53218100 | -1.95979800 | -2.17656900 |
| H                                                     | -3.41932600 | 2.80540400  | 1.10490700  |
| H                                                     | -2.43197800 | 3.68492200  | -0.04760200 |
| H                                                     | -1.28205300 | 1.06464000  | 0.74003200  |
| H                                                     | -1.60208900 | -0.66960100 | -0.53122900 |
| H                                                     | -5.10206400 | -1.85715500 | -2.16300000 |
| H                                                     | -4.98219200 | -0.48582600 | -1.05323600 |
| H                                                     | -2.10355000 | 4.22960400  | 2.39960600  |
| H                                                     | -1.39005500 | 2.62631500  | 2.64249000  |
| H                                                     | 4.13921400  | 1.55852100  | 1.10490700  |
| H                                                     | 4.40722500  | 0.26369400  | -0.04760200 |
| H                                                     | 1.56303200  | 0.57797100  | 0.74003200  |
| H                                                     | 0.22115300  | 1.72225000  | -0.53122900 |
| H                                                     | -0.43114400 | 3.17283200  | -2.17656900 |
| H                                                     | 1.17976400  | 3.11416300  | -2.91311100 |
| H                                                     | 4.71472000  | -0.29307400 | 2.39960600  |
| H                                                     | 2.96948300  | -0.10933400 | 2.64249000  |
| H                                                     | 2.07035800  | 4.55761800  | -1.05323600 |
| H                                                     | 0.94268900  | 5.34709400  | -2.16300000 |
| H                                                     | 2.96332500  | -1.21303400 | -2.17656900 |
| H                                                     | 2.10706200  | -2.57878800 | -2.91311100 |
| H                                                     | 1.38093600  | -1.05265000 | -0.53122900 |
| H                                                     | -0.28097900 | -1.64261100 | 0.74003200  |
| H                                                     | -1.97524700 | -3.94861600 | -0.04760200 |
| H                                                     | -0.71988800 | -4.36392500 | 1.10490700  |
| H                                                     | 4.15937500  | -3.48993900 | -2.16300000 |
| H                                                     | 2.91183400  | -4.07179200 | -1.05323600 |
| H                                                     | -2.61116900 | -3.93653000 | 2.39960600  |
| H                                                     | -1.57942800 | -2.51698100 | 2.64249000  |
| F                                                     | 0.00000000  | 0.00000000  | 1.17802800  |

1-Cl (model ) B3LYP/6-31(1)++G(d,p)

|    |             |             |             |
|----|-------------|-------------|-------------|
| C  | -2.98257500 | 0.79185400  | -1.96000200 |
| C  | -0.33148000 | 3.89490600  | 0.69318800  |
| N  | -0.62357800 | 2.54045500  | 0.25211200  |
| C  | -1.50084500 | 2.37482100  | -0.80548700 |
| N  | -1.94868000 | 1.09602100  | -0.99136700 |
| O  | -1.82236300 | 3.31143800  | -1.55354500 |
| C  | -4.38950600 | 1.26673900  | -1.56439500 |
| C  | 0.70081600  | 3.95152700  | 1.81316000  |
| C  | 3.53882800  | -1.66038300 | 0.69318800  |
| N  | 2.51188700  | -0.73019300 | 0.25211200  |
| C  | 2.80707800  | 0.11236000  | -0.80548700 |
| N  | 1.92352200  | 1.13959600  | -0.99136700 |
| C  | 2.17705300  | 2.18705900  | -1.96000200 |
| O  | 3.77897100  | -0.07750700 | -1.55354500 |
| C  | 3.07171500  | -2.58268700 | 1.81316000  |
| C  | 3.29178100  | 3.16805400  | -1.56439500 |
| C  | 0.80552200  | -2.97891300 | -1.96000200 |
| N  | 0.02515800  | -2.23561700 | -0.99136700 |
| C  | -1.30623200 | -2.48718000 | -0.80548700 |
| N  | -1.88831000 | -1.81026200 | 0.25211200  |
| C  | -3.20734700 | -2.23452300 | 0.69318800  |
| O  | -1.95660800 | -3.23393200 | -1.55354500 |
| C  | 1.09772500  | -4.43479300 | -1.56439500 |
| C  | -3.77253000 | -1.36883900 | 1.81316000  |
| S  | 2.46573200  | 3.50442300  | 1.45302200  |
| S  | 2.93589200  | 4.50181800  | -0.33200400 |
| S  | 1.80205400  | -3.88759800 | 1.45302200  |
| S  | 2.43074200  | -4.79346600 | -0.33200400 |
| S  | -4.26778500 | 0.38317400  | 1.45302200  |
| S  | -5.36663400 | 0.29164800  | -0.33200400 |
| H  | -2.72744100 | 1.29367600  | -2.90050600 |
| H  | -2.97098800 | -0.28707700 | -2.13670600 |
| H  | -1.24111400 | 4.38805000  | 1.07412700  |
| H  | 0.00000000  | 4.48428300  | -0.16586200 |
| H  | -0.61196300 | 1.81289600  | 0.97322400  |
| H  | -1.76857400 | 0.39321600  | -0.28609900 |
| H  | -5.04973500 | 1.22106500  | -2.44070100 |
| H  | -4.34790300 | 2.30760300  | -1.23624000 |
| H  | 0.69873800  | 4.96223800  | 2.23087700  |
| H  | 0.44856900  | 3.24852000  | 2.61661100  |
| H  | 4.42072000  | -1.11918900 | 1.07412700  |
| H  | 3.88350300  | -2.24214100 | -0.16586200 |
| H  | 1.87599500  | -0.37647200 | 0.97322400  |
| H  | 1.22482200  | 1.33502200  | -0.28609900 |
| H  | 1.23687800  | 2.71649000  | -2.13670600 |
| H  | 2.48407600  | 1.71519500  | -2.90050600 |
| H  | 3.94805600  | -3.08624400 | 2.23087700  |
| H  | 2.58901600  | -2.01273200 | 2.61661100  |
| H  | 4.17239400  | 2.61159300  | -1.23624000 |
| H  | 3.58234100  | 3.76266600  | -2.44070100 |
| H  | 1.73411100  | -2.42941300 | -2.13670600 |
| H  | 0.24336400  | -3.00887100 | -2.90050600 |
| H  | 0.54375200  | -1.72823800 | -0.28609900 |
| H  | -1.26403200 | -1.43642300 | 0.97322400  |
| H  | -3.88350300 | -2.24214100 | -0.16586200 |
| H  | -3.17960600 | -3.26886100 | 1.07412700  |
| H  | 1.46739400  | -4.98373100 | -2.44070100 |
| H  | 0.17550900  | -4.91919500 | -1.23624000 |
| H  | -4.64679300 | -1.87599500 | 2.23087700  |
| H  | -3.03758600 | -1.23578800 | 2.61661100  |
| Cl | 0.00000000  | 0.00000000  | 2.27282800  |

1-Br<sup>-</sup> (model ) B3LYP/6-31(1)++G(d,p)

|    |             |             |             |
|----|-------------|-------------|-------------|
| C  | -2.66123600 | 1.40868400  | -2.06082000 |
| C  | 0.60728400  | 3.92588300  | 0.53415300  |
| N  | 0.00000000  | 2.66071200  | 0.15232000  |
| C  | -0.87634800 | 2.65587800  | -0.92080600 |
| N  | -1.62881000 | 1.52296700  | -1.05041900 |
| O  | -0.93819700 | 3.59609400  | -1.72833400 |
| C  | -3.94084400 | 2.20334100  | -1.75585400 |
| C  | 1.65234100  | 3.78814700  | 1.63536300  |
| C  | 3.09627200  | -2.48886500 | 0.53415300  |
| N  | 2.30424400  | -1.33035600 | 0.15232000  |
| C  | 2.73823200  | -0.56899900 | -0.92080600 |
| N  | 2.13333300  | 0.64910700  | -1.05041900 |
| C  | 2.55057400  | 1.60035500  | -2.06082000 |
| O  | 3.58340700  | -0.98554500 | -1.72833400 |
| C  | 2.45446100  | -3.32504300 | 1.63536300  |
| C  | 3.87857100  | 2.31120100  | -1.75585400 |
| C  | 0.11066100  | -3.00904000 | -2.06082000 |
| N  | -0.50452300 | -2.17207400 | -1.05041900 |
| C  | -1.86188300 | -2.08687900 | -0.92080600 |
| N  | -2.30424400 | -1.33035600 | 0.15232000  |
| C  | -3.70355600 | -1.43701800 | 0.53415300  |
| O  | -2.64521000 | -2.61054900 | -1.72833400 |
| C  | 0.06227300  | -4.51454100 | -1.75585400 |
| C  | -4.10680200 | -0.46310500 | 1.63536300  |
| S  | 3.25871000  | 2.93543300  | 1.26606100  |
| S  | 3.89615400  | 3.73022000  | -0.56772900 |
| S  | 0.91280500  | -4.28984300 | 1.26606100  |
| S  | 1.28238900  | -5.23927800 | -0.56772900 |
| S  | -4.17151500 | 1.35440900  | 1.26606100  |
| S  | -5.17854300 | 1.50905800  | -0.56772900 |
| H  | -2.25825400 | 1.79666900  | -3.00318800 |
| H  | -2.88496200 | 0.34735400  | -2.19730900 |
| H  | -0.15447800 | 4.63133300  | 0.90595400  |
| H  | 1.04541600  | 4.38623200  | -0.35505900 |
| H  | -0.17918400 | 1.99562000  | 0.90863500  |
| H  | -1.62919900 | 0.82763000  | -0.31604600 |
| H  | -4.54661100 | 2.28503600  | -2.66804500 |
| H  | -3.67966400 | 3.21576600  | -1.44010100 |
| H  | 1.89077300  | 4.78879500  | 2.00690000  |
| H  | 1.26711700  | 3.19599000  | 2.47469200  |
| H  | 4.08809100  | -2.18188400 | 0.90595400  |
| H  | 3.27588100  | -3.09847300 | -0.35505900 |
| H  | 1.81784900  | -0.84263200 | 0.90863500  |
| H  | 1.53134800  | 0.99711200  | -0.31604600 |
| H  | 1.74329800  | 2.32477400  | -2.19730900 |
| H  | 2.68508800  | 1.05737000  | -3.00318800 |
| H  | 3.20183200  | -4.03185500 | 2.00690000  |
| H  | 2.13425000  | -2.69535000 | 2.47469200  |
| H  | 4.62476700  | 1.57880000  | -1.44010100 |
| H  | 4.25220500  | 2.79496200  | -2.66804500 |
| H  | 1.14166400  | -2.67212700 | -2.19730900 |
| H  | -0.42683400 | -2.85403900 | -3.00318800 |
| H  | 0.09785100  | -1.82474200 | -0.31604600 |
| H  | -1.63866500 | -1.15298800 | 0.90863500  |
| H  | -4.32129700 | -1.28775900 | -0.35505900 |
| H  | -3.93361300 | -2.44944800 | 0.90595400  |
| H  | 0.29440600  | -5.07999800 | -2.66804500 |
| H  | -0.94510200 | -4.79456600 | -1.44010100 |
| H  | -5.09260500 | -0.75694000 | 2.00690000  |
| H  | -3.40136700 | -0.50064000 | 2.47469200  |
| Br | 0.00000000  | 0.00000000  | 2.40269300  |

1-I (model ) B3LYP/6-31(1)++G(d,p)

|   |             |             |             |
|---|-------------|-------------|-------------|
| C | -2.62991400 | 1.37147900  | -2.23831000 |
| C | 0.60447600  | 3.94448900  | 0.34698700  |
| N | 0.00000000  | 2.66916000  | -0.00964900 |
| C | -0.85618800 | 2.63671000  | -1.10186300 |
| N | -1.62208200 | 1.51138500  | -1.20536000 |
| O | -0.88353000 | 3.54548300  | -1.94537300 |
| C | -3.91993500 | 2.16429000  | -1.97638600 |
| C | 1.66845500  | 3.83068100  | 1.43275700  |
| C | 3.11379000  | -2.49573700 | 0.34698700  |
| N | 2.31156100  | -1.33458000 | -0.00964900 |
| C | 2.71155200  | -0.57687400 | -1.10186300 |
| N | 2.11993900  | 0.64907200  | -1.20536000 |
| C | 2.50269300  | 1.59183200  | -2.23831000 |
| O | 3.51224300  | -1.00758200 | -1.94537300 |
| C | 2.48324000  | -3.36026500 | 1.43275700  |
| C | 3.83429800  | 2.31261900  | -1.97638600 |
| C | 0.12722100  | -2.96331200 | -2.23831000 |
| N | -0.49785600 | -2.16045700 | -1.20536000 |
| C | -1.85536400 | -2.05983600 | -1.10186300 |
| N | -2.31156100 | -1.33458000 | -0.00964900 |
| C | -3.71826600 | -1.44875300 | 0.34698700  |
| O | -2.62871300 | -2.53790100 | -1.94537300 |
| C | 0.08563800  | -4.47690800 | -1.97638600 |
| C | -4.15169500 | -0.47041600 | 1.43275700  |
| S | 3.26831600  | 2.97346200  | 1.04943800  |
| S | 3.87380400  | 3.74541700  | -0.80535200 |
| S | 0.94093600  | -4.31717600 | 1.04943800  |
| S | 1.30672500  | -5.22752100 | -0.80535200 |
| S | -4.20925200 | 1.34371300  | 1.04943800  |
| S | -5.18052800 | 1.48210400  | -0.80535200 |
| H | -2.20496800 | 1.74633400  | -3.17600100 |
| H | -2.84472500 | 0.30708600  | -2.36328700 |
| H | -0.15680700 | 4.64937500  | 0.72061700  |
| H | 1.02369900  | 4.39179100  | -0.55731600 |
| H | -0.22000700 | 2.04805600  | 0.76998800  |
| H | -1.64692500 | 0.83955300  | -0.44977900 |
| H | -4.50481700 | 2.22735800  | -2.90348300 |
| H | -3.67173300 | 3.18342000  | -1.67140100 |
| H | 1.91063900  | 4.83913500  | 1.78015200  |
| H | 1.30034200  | 3.25402300  | 2.29064600  |
| H | 4.10488000  | -2.18888800 | 0.72061700  |
| H | 3.29155400  | -3.08244500 | -0.55731600 |
| H | 1.88367200  | -0.83349600 | 0.76998800  |
| H | 1.55053600  | 1.00650200  | -0.44977900 |
| H | 1.68830700  | 2.31006100  | -2.36328700 |
| H | 2.61485300  | 1.03639100  | -3.17600100 |
| H | 3.23549500  | -4.07422900 | 1.78015200  |
| H | 2.16789500  | -2.75314100 | 2.29064600  |
| H | 4.59278900  | 1.58810500  | -1.67140100 |
| H | 4.18135700  | 2.78760700  | -2.90348300 |
| H | 1.15641800  | -2.61714800 | -2.36328700 |
| H | -0.40988600 | -2.78272500 | -3.17600100 |
| H | 0.09638800  | -1.84605500 | -0.44977900 |
| H | -1.66366500 | -1.21456000 | 0.76998800  |
| H | -4.31525200 | -1.30934700 | -0.55731600 |
| H | -3.94807300 | -2.46048600 | 0.72061700  |
| H | 0.32346000  | -5.01496500 | -2.90348300 |
| H | -0.92105500 | -4.77152400 | -1.67140100 |
| H | -5.14613400 | -0.76490600 | 1.78015200  |
| H | -3.46823700 | -0.50088200 | 2.29064600  |
| I | 0.00000000  | 0.00000000  | 2.65717600  |

1- NO<sub>3</sub><sup>-</sup> (model ) B3LYP/6-31(1)++G(d,p)

|   |             |             |             |
|---|-------------|-------------|-------------|
| C | -2.67524300 | 1.45936200  | -1.68202800 |
| C | 0.74559000  | 4.35241400  | 0.27797200  |
| N | 0.00000000  | 3.11103500  | 0.22000400  |
| C | -0.87543100 | 2.89309900  | -0.82042000 |
| N | -1.70747200 | 1.81612700  | -0.66478600 |
| O | -0.88543500 | 3.60870600  | -1.83539300 |
| C | -3.97981400 | 2.27233400  | -1.63564600 |
| C | 1.77620100  | 4.37785500  | 1.40026700  |
| C | 3.39650700  | -2.82190700 | 0.27797200  |
| N | 2.69423600  | -1.55551800 | 0.22000400  |
| C | 2.94321300  | -0.68840400 | -0.82042000 |
| N | 2.42654800  | 0.57065000  | -0.66478600 |
| C | 2.60146600  | 1.58714700  | -1.68202800 |
| O | 3.56794900  | -1.03754400 | -1.83539300 |
| C | 2.90323300  | -3.72716300 | 1.40026700  |
| C | 3.95780600  | 2.31045300  | -1.63564600 |
| C | 0.07377700  | -3.04650900 | -1.68202800 |
| N | -0.71907700 | -2.38677800 | -0.66478600 |
| C | -2.06778200 | -2.20469500 | -0.82042000 |
| N | -2.69423600 | -1.55551800 | 0.22000400  |
| C | -4.14209600 | -1.53050800 | 0.27797200  |
| O | -2.68251400 | -2.57116200 | -1.83539300 |
| C | 0.02200800  | -4.58278700 | -1.63564600 |
| C | -4.67943400 | -0.65069200 | 1.40026700  |
| S | 3.22050800  | 3.22431700  | 1.31194000  |
| S | 4.17362700  | 3.74772600  | -0.47789900 |
| S | 1.18208700  | -4.40120000 | 1.31194000  |
| S | 1.15881200  | -5.48833000 | -0.47789900 |
| S | -4.40259500 | 1.17688300  | 1.31194000  |
| S | -5.33243900 | 1.74060400  | -0.47789900 |
| H | -2.21502900 | 1.65006200  | -2.65672000 |
| H | -2.87718400 | 0.38906400  | -1.60779300 |
| H | 0.07227900  | 5.21138400  | 0.43932400  |
| H | 1.23233300  | 4.52676000  | -0.68667500 |
| H | -0.11428300 | 2.55779600  | 1.06675100  |
| H | -1.74717500 | 1.34741300  | 0.23130600  |
| H | -4.48511300 | 2.21263900  | -2.60774600 |
| H | -3.74901700 | 3.32117900  | -1.43824000 |
| H | 2.16548500  | 5.39556700  | 1.49565800  |
| H | 1.32036000  | 4.10680000  | 2.36139500  |
| H | 4.47705100  | -2.66828700 | 0.43932400  |
| H | 3.30412300  | -3.33061200 | -0.68667500 |
| H | 2.27225700  | -1.17992600 | 1.06675100  |
| H | 2.04048100  | 0.83939100  | 0.23130600  |
| H | 1.77553100  | 2.29718200  | -1.60779300 |
| H | 2.53651000  | 1.09324000  | -2.65672000 |
| H | 3.58995500  | -4.57314800 | 1.49565800  |
| H | 2.89641300  | -3.19686600 | 2.36139500  |
| H | 4.75073400  | 1.58615500  | -1.43824000 |
| H | 4.15875800  | 2.77790300  | -2.60774600 |
| H | 1.10165200  | -2.68624600 | -1.60779300 |
| H | -0.32148100 | -2.74330200 | -2.65672000 |
| H | -0.29330700 | -2.18680400 | 0.23130600  |
| H | -2.15797500 | -1.37786900 | 1.06675100  |
| H | -4.53645600 | -1.19614900 | -0.68667500 |
| H | -4.54933000 | -2.54309600 | 0.43932400  |
| H | 0.32635500  | -4.99054100 | -2.60774600 |
| H | -1.00171700 | -4.90733400 | -1.43824000 |
| H | -5.75544000 | -0.82241800 | 1.49565800  |
| H | -4.21677300 | -0.90993400 | 2.36139500  |
| N | 0.00000000  | 0.00000000  | 2.19178500  |



|   |             |             |            |
|---|-------------|-------------|------------|
| O | -0.50760800 | -1.14959200 | 2.18745700 |
| O | 1.24938000  | 0.13519400  | 2.18745700 |
| O | -0.74177100 | 1.01439800  | 2.18745700 |
